# Supplementary material for: Construction of a high-density genetic map using specific-locus amplified fragment sequencing and quantitative trait loci analysis for tillering related traits in Psathyrostachys juncea perennial grass
Source: PeerJ. 2024 Nov 6;12:e18409. doi: 10.7717/peerj.18409 (PMC11549907; doi:10.7717/peerj.18409)
Supplement: Supplemental Information 2 [file peerj-12-18409-s002.xlsx]

## Sheet: Sheet1
Genetic maps of Russia wildrye linkage group maps
Linkage group 1	cM	Linkage group 2	cM	Linkage group 3	cM	Linkage group 4	cM	Linkage group 5	cM	Linkage group 6	cM	Linkage group 7	cM
Marker6505	0	Marker40087	0	Marker5872	0	Marker8710	0	Marker20792	0	Marker34573	0	Marker9348	0
Marker6503	0	Marker40089	0	Marker13395	0	Marker8709	0	Marker20793	0	Marker34571	0.157	Marker6582	0
Marker6501	0	Marker60621	0	Marker5875	0	Marker35903	0.994	Marker5547	9.505	Marker34570	0.249	Marker5250	2.084
Marker6506	0	Marker15582	1.227	Marker13396	0	Marker36500	0.994	Marker19014	14.717	Marker28718	0.313	Marker8150	2.084
Marker5810	1.379	Marker15799	1.227	Marker5873	0	Marker60512	6.756	Marker19012	16.8	Marker1474	5.338	Marker5649	6.256
Marker36381	1.379	Marker15798	1.227	Marker6170	6.172	Marker59684	6.756	Marker23910	20.281	Marker1472	5.338	Marker5648	6.256
Marker59657	1.379	Marker15800	1.227	Marker1499	6.172	Marker60758	7.441	Marker20870	20.63	Marker21598	8.136	Marker60795	8.615
Marker60006	1.379	Marker18990	1.227	Marker12398	6.172	Marker12628	8.106	Marker23911	21.846	Marker21599	8.821	Marker8359	8.615
Marker10360	1.379	Marker13777	1.912	Marker6323	6.857	Marker12629	8.106	Marker41716	23.949	Marker34694	10.2	Marker60794	9.3
Marker5812	1.379	Marker31514	2.597	Marker6322	6.857	Marker17515	8.126	Marker60476	25.273	Marker21597	11.579	Marker18082	10.514
Marker59656	1.379	Marker31517	2.597	Marker12586	6.857	Marker62221	11.649	Marker31950	26.256	Marker28719	13.683	Marker46045	10.679
Marker14326	1.379	Marker1566	2.597	Marker177	7.542	Marker12653	11.649	Marker32858	26.256	Marker337	14.377	Marker8360	10.679
Marker5951	1.379	Marker28097	3.282	Marker11441	7.542	Marker6147	11.649	Marker31949	29.387	Marker3926	14.377	Marker2866	11.199
Marker62060	1.379	Marker20272	7.312	Marker31810	7.542	Marker27734	11.649	Marker31948	29.691	Marker28623	15.062	Marker14485	11.199
Marker62004	1.379	Marker7395	7.312	Marker17343	7.542	Marker18536	11.649	Marker31947	29.691	Marker1716	15.062	Marker4257	11.199
Marker5811	1.379	Marker56714	15.418	Marker30019	7.542	Marker60170	11.649	Marker31946	29.691	Marker61671	15.062	Marker1825	11.199
Marker5814	1.379	Marker60820	15.418	Marker29951	7.542	Marker31420	11.649	Marker13233	30.25	Marker61670	15.062	Marker6579	11.199
Marker62061	1.379	Marker60823	15.418	Marker29949	7.542	Marker62223	11.649	Marker1572	31.396	Marker61672	15.062	Marker60383	11.364
Marker24711	1.379	Marker56715	15.418	Marker61807	7.542	Marker4060	11.649	Marker2033	33.101	Marker6053	15.65	Marker9347	11.364
Marker62003	1.379	Marker259	15.418	Marker4495	7.542	Marker11301	11.649	Marker1021	33.381	Marker6054	15.65	Marker60179	12.049
Marker10672	4.7	Marker62096	15.418	Marker8386	9.732	Marker542	12.334	Marker2032	34.807	Marker19544	17.438	Marker4897	13.428
Marker10671	4.7	Marker1487	15.418	Marker630	9.732	Marker1202	12.334	Marker2137	36.512	Marker17750	17.438	Marker4900	13.428
Marker2159	5.277	Marker1484	15.418	Marker8586	9.732	Marker60360	12.364	Marker58785	36.512	Marker23102	17.559	Marker1826	14.721
Marker2158	5.277	Marker56713	15.418	Marker60755	9.732	Marker61588	12.364	Marker6550	36.512	Marker25692	18.025	Marker10751	14.721
Marker6502	5.277	Marker61941	15.418	Marker15947	9.732	Marker11924	12.364	Marker7235	37.43	Marker3043	18.025	Marker11307	14.808
Marker4957	5.277	Marker9346	16.103	Marker19439	9.732	Marker61589	12.364	Marker5916	37.43	Marker34695	18.38	Marker61920	14.808
Marker11951	6.231	Marker13270	16.103	Marker40501	9.732	Marker62222	12.364	Marker60478	37.887	Marker915	18.613	Marker14486	15.493
Marker6253	6.231	Marker11394	16.103	Marker25950	11.816	Marker3934	12.364	Marker19768	37.887	Marker56023	18.613	Marker9272	15.493
Marker8122	7.186	Marker275	16.103	Marker11440	11.816	Marker11923	12.364	Marker19764	37.887	Marker916	18.613	Marker9908	15.493
Marker61856	7.186	Marker26840	16.103	Marker1511	13.303	Marker1989	13.019	Marker60947	38.572	Marker1384	18.613	Marker6580	16.101
Marker5952	8.021	Marker16493	16.103	Marker1509	13.303	Marker18459	13.049	Marker59873	38.572	Marker28034	19.201	Marker60792	16.101
Marker5827	8.021	Marker62097	16.103	Marker17169	14.683	Marker60072	13.049	Marker19011	38.572	Marker13171	19.201	Marker1226	16.101
Marker5813	8.021	Marker13269	16.103	Marker10615	14.683	Marker60683	13.049	Marker19013	38.572	Marker56022	19.201	Marker21509	16.101
Marker2084	8.14	Marker2205	16.103	Marker2994	15.338	Marker18457	13.049	Marker60178	38.572	Marker3046	19.201	Marker1824	16.101
Marker4580	8.14	Marker151	16.103	Marker252	15.338	Marker11925	13.049	Marker19767	39.266	Marker3045	19.201	Marker60675	16.178
Marker8120	8.14	Marker861	16.103	Marker7847	15.338	Marker11926	13.049	Marker4310	39.951	Marker60273	19.201	Marker1227	18.184
Marker8867	8.14	Marker10176	16.103	Marker4398	15.338	Marker5838	13.049	Marker1886	39.951	Marker11391	19.201	Marker2933	19.564
Marker8121	8.14	Marker258	16.103	Marker7919	15.338	Marker17293	13.049	Marker61862	40.636	Marker677	20.242	Marker16691	19.564
Marker5169	9.094	Marker10177	16.103	Marker10614	15.368	Marker5837	13.049	Marker21506	40.645	Marker1070	20.242	Marker60548	20.248
Marker60983	10.048	Marker60818	16.103	Marker10617	15.368	Marker4820	13.049	Marker3722	40.645	Marker31489	20.242	Marker16859	20.933
Marker61790	11.002	Marker152	16.103	Marker4937	15.368	Marker112	15.847	Marker9070	41.321	Marker1571	20.242	Marker16860	20.933
Marker61819	11.002	Marker26600	16.434	Marker10619	16.747	Marker19294	15.847	Marker12465	41.321	Marker28036	20.242	Marker16861	21.618
Marker12751	11.002	Marker26601	16.434	Marker4938	16.747	Marker28847	16.541	Marker1881	41.321	Marker5093	20.242	Marker21508	23.702
Marker21155	11.002	Marker18343	16.434	Marker7522	18.136	Marker4059	16.541	Marker1879	41.321	Marker3042	20.932	Marker2938	24.387
Marker21153	13.905	Marker60824	17.483	Marker16167	18.136	Marker35900	16.541	Marker6125	41.33	Marker820	21.615	Marker2934	24.387
Marker62002	13.905	Marker16132	17.483	Marker8014	18.831	Marker60510	17.226	Marker5516	41.33	Marker6437	21.615	Marker2936	24.387
Marker61154	13.905	Marker60821	18.167	Marker10618	18.831	Marker62020	17.226	Marker61736	41.33	Marker3044	21.615	Marker2932	24.387
Marker3410	13.905	Marker60822	18.167	Marker1642	18.831	Marker13057	17.226	Marker61508	42.71	Marker61128	21.615	Marker2937	24.387
Marker36377	13.905	Marker32936	18.852	Marker31958	18.831	Marker33582	17.226	Marker2714	43.404	Marker61248	21.615	Marker1229	25.072
Marker36378	13.905	Marker26599	19.537	Marker25250	19.516	Marker4736	17.226	Marker22054	43.404	Marker8599	22.316	Marker2935	25.072
Marker61155	18.812	Marker889	20.222	Marker11163	19.516	Marker18535	17.226	Marker18183	43.404	Marker1615	22.316	Marker4065	29.33
Marker14325	18.812	Marker13759	20.222	Marker11161	19.516	Marker110	17.765	Marker61030	43.404	Marker8600	22.316	Marker25490	29.33
Marker7835	18.812	Marker8011	20.222	Marker3915	19.516	Marker6608	18.167	Marker851	43.404	Marker15447	22.316	Marker25491	29.33
Marker24709	21.142	Marker60733	20.222	Marker16562	19.516	Marker17093	18.167	Marker5052	43.404	Marker61070	22.316	Marker25489	29.33
Marker24710	21.142	Marker24551	20.222	Marker25253	19.516	Marker35902	18.167	Marker1342	44.089	Marker23189	22.316	Marker4066	29.33
Marker24713	21.142	Marker894	20.222	Marker7520	20.205	Marker111	18.303	Marker11008	44.089	Marker61071	22.316	Marker61140	29.33
Marker12753	26.839	Marker32934	20.907	Marker25256	20.548	Marker109	18.303	Marker20874	46.173	Marker61247	22.316	Marker10523	29.33
Marker12754	26.839	Marker60819	20.907	Marker60240	20.548	Marker1201	18.841	Marker62214	46.858	Marker5146	22.99	Marker2382	29.33
Marker21154	26.839	Marker26598	20.907	Marker921	21.932	Marker19221	18.841	Marker62213	46.858	Marker61315	22.99	Marker15191	29.33
Marker25619	26.839	Marker890	21.592	Marker60046	21.932	Marker7416	18.841	Marker2689	47.543	Marker3998	22.99	Marker25492	29.33
Marker4579	26.839	Marker1942	22.277	Marker14998	21.932	Marker4734	19.108	Marker29825	49.627	Marker4889	22.99	Marker61139	29.33
Marker61318	27.793	Marker1139	22.277	Marker58434	21.932	Marker4735	19.108	Marker8266	51.71	Marker52301	22.99	Marker4064	29.33
Marker61820	27.793	Marker60482	22.277	Marker10620	21.932	Marker60622	19.38	Marker8267	52.395	Marker5147	22.99	Marker62081	29.33
Marker9656	37.354	Marker60325	22.962	Marker1641	21.932	Marker60513	19.918	Marker22055	57.399	Marker3047	23.003	Marker20547	29.33
Marker8865	37.354	Marker3145	23.647	Marker58435	21.932	Marker62176	19.918	Marker2222	57.399	Marker61206	23.003	Marker2972	30.642
Marker15301	37.354	Marker50125	24.332	Marker2995	22.964	Marker61303	21.003	Marker36658	57.399	Marker1037	23.673	Marker4898	30.642
Marker15302	37.354	Marker4329	24.332	Marker25252	22.964	Marker60130	22.387	Marker61204	57.399	Marker23103	23.673	Marker10236	31.294
Marker9654	37.888	Marker14677	24.332	Marker62011	22.964	Marker59963	22.387	Marker4193	57.399	Marker4888	23.673	Marker24579	32.607
Marker28012	40.07	Marker3144	24.332	Marker25257	22.964	Marker12654	22.862	Marker7826	57.399	Marker1619	23.69	Marker15473	33.041
Marker3411	40.07	Marker59682	24.332	Marker16561	22.964	Marker2457	22.862	Marker11126	57.399	Marker62220	23.69	Marker2259	34.589
Marker3409	40.07	Marker3143	24.332	Marker58436	22.964	Marker61322	23.317	Marker1887	57.399	Marker29083	24.377	Marker4896	34.589
Marker3339	41.146	Marker14678	24.332	Marker25255	22.964	Marker11302	23.317	Marker9071	57.399	Marker19542	24.377	Marker2971	34.589
Marker9652	41.68	Marker473	24.332	Marker16563	22.964	Marker60336	23.317	Marker36657	57.399	Marker8905	24.377	Marker11946	34.589
Marker9653	42.215	Marker183	25.711	Marker25251	22.964	Marker5831	23.317	Marker23909	57.399	Marker1618	25.064	Marker10235	34.589
Marker8863	42.749	Marker184	26.396	Marker60043	22.964	Marker8711	23.772	Marker1880	58.084	Marker132	25.064	Marker27131	35.237
Marker15299	42.749	Marker1205	27.081	Marker22050	23.994	Marker60507	23.772	Marker26989	60.168	Marker3048	25.751	Marker10234	35.241
Marker8862	42.749	Marker60324	27.081	Marker23482	23.994	Marker60070	23.772	Marker14238	60.168	Marker60829	25.751	Marker27132	35.958
Marker15300	42.749	Marker886	27.081	Marker11159	23.998	Marker218	23.772	Marker1878	62.251	Marker190	25.751	Marker17813	38.154
Marker8866	43.283	Marker888	27.081	Marker11160	23.998	Marker946	23.772	Marker1884	62.251	Marker3996	26.856	Marker60955	38.154
Marker8864	43.283	Marker24552	27.081	Marker11162	23.998	Marker60500	23.772	Marker15667	62.936	Marker3007	26.856	Marker17984	38.154
Marker61230	44.359	Marker1140	27.766	Marker7521	23.998	Marker60800	23.772	Marker21240	63.621	Marker4000	26.856	Marker17983	38.154
Marker35451	44.359	Marker60483	27.766	Marker3815	24.511	Marker59958	23.772	Marker19387	64.306	Marker192	26.856	Marker12664	38.154
Marker35452	44.359	Marker21611	27.847	Marker3816	24.511	Marker18456	23.772	Marker60562	75.041	Marker11259	26.856	Marker17814	38.875
Marker59819	44.893	Marker21609	27.847	Marker25254	24.511	Marker1017	23.772	Marker13140	75.041	Marker52305	26.856	Marker17812	39.597
Marker62075	44.893	Marker14381	29.226	Marker61314	25.024	Marker62348	23.772	Marker62030	75.041	Marker23236	26.856	Marker27130	39.597
Marker2342	44.893	Marker58064	29.226	Marker16564	25.024	Marker60224	23.772	Marker11824	75.726	Marker191	26.856	Marker60954	39.597
Marker62177	44.893	Marker1486	29.85	Marker59738	25.024	Marker60108	23.772	Marker11825	75.726	Marker31488	26.856	Marker12663	39.597
Marker62178	44.893	Marker262	29.85	Marker33526	28.029	Marker8712	23.772	Marker15040	76.411	Marker3997	26.856	Marker27134	39.597
Marker60700	44.893	Marker6899	29.911	Marker3123	28.029	Marker60334	23.772	Marker11826	77.096	Marker52302	26.856	Marker60952	39.597
Marker60698	44.893	Marker6640	29.911	Marker22049	28.029	Marker62349	23.772	Marker11823	77.096	Marker61316	26.856	Marker15474	39.597
Marker35453	44.893	Marker7750	30.535	Marker3122	28.029	Marker59962	23.772	Marker29837	78.475	Marker821	26.856	Marker19207	41.05
Marker60164	44.893	Marker29555	30.535	Marker59927	28.283	Marker26505	23.772	Marker29842	78.475	Marker3061	26.856	Marker60956	41.05
Marker2343	44.893	Marker8013	30.535	Marker17858	28.283	Marker60502	23.772	Marker29840	78.475	Marker10929	27.404	Marker19208	41.772
Marker61231	44.893	Marker24824	30.535	Marker12451	29.017	Marker59959	23.772	Marker61795	78.475	Marker52304	27.404	Marker60953	41.772
Marker14493	44.893	Marker15936	30.535	Marker17168	30.005	Marker59960	23.772	Marker29833	78.475	Marker29082	27.586	Marker22283	43.225
Marker60696	44.893	Marker13758	30.535	Marker31036	30.005	Marker60109	23.772	Marker29832	78.475	Marker1616	27.586	Marker8272	43.947
Marker35450	44.893	Marker17949	30.535	Marker31566	30.005	Marker28489	23.772	Marker61796	78.475	Marker6327	27.586	Marker4982	44.669
Marker60697	44.893	Marker57888	30.596	Marker4509	30.005	Marker10370	23.772	Marker29841	78.475	Marker8903	27.586	Marker8268	46.122
Marker35	46.87	Marker2967	30.596	Marker3689	30.424	Marker60504	23.772	Marker29836	78.475	Marker1815	27.586	Marker4071	46.122
Marker25921	46.87	Marker59243	30.596	Marker3690	30.424	Marker4732	23.772	Marker29839	78.475	Marker10426	27.586	Marker5948	46.922
Marker55149	47.52	Marker6800	30.596	Marker18211	30.424	Marker62351	23.772	Marker11636	79.16	Marker1613	27.586	Marker5949	47.574
Marker38915	47.52	Marker60394	30.596	Marker4512	30.992	Marker1016	23.772	Marker59836	79.845	Marker1821	27.586	Marker8271	47.575
Marker38916	47.52	Marker61874	30.596	Marker7917	30.992	Marker223	23.772	Marker60565	81.225	Marker1822	27.586	Marker8273	48.297
Marker55150	47.52	Marker1943	30.596	Marker20750	32.565	Marker60169	23.772	Marker61640	81.91	Marker19541	27.586	Marker6469	49.019
Marker25923	48.169	Marker61360	30.596	Marker12498	32.565	Marker27735	23.772	Marker61639	81.91	Marker6324	27.586	Marker6471	51.214
Marker55152	48.169	Marker15939	30.596	Marker8115	32.565	Marker60766	23.772	Marker15041	82.595	Marker471	27.953	Marker6470	51.214
Marker25924	48.169	Marker6803	31.281	Marker1186	33.998	Marker21146	23.772	Marker15043	82.595	Marker1069	27.953	Marker5947	51.625
Marker17551	48.169	Marker6900	31.281	Marker631	33.998	Marker62350	23.772	Marker2948	83.974	Marker20462	30.194	Marker4981	52.667
Marker55151	48.169	Marker15940	31.281	Marker1501	33.998	Marker2389	23.772	Marker2775	83.974	Marker23105	30.194	Marker15475	52.938
Marker7433	48.169	Marker59948	31.281	Marker12399	33.998	Marker60335	24.528	Marker61738	84.659	Marker15446	30.358	Marker62354	53.389
Marker7999	48.617	Marker33604	31.281	Marker14996	33.998	Marker11632	25.285	Marker61641	85.344	Marker61072	30.358	Marker60891	53.389
Marker7998	48.617	Marker61362	31.281	Marker60393	33.998	Marker25671	25.285	Marker21332	86.723	Marker26760	30.358	Marker62352	54.111
Marker8018	48.617	Marker6639	31.281	Marker12584	34.985	Marker11633	26.328	Marker5076	90.246	Marker60828	30.358	Marker5589	54.251
Marker62078	50.075	Marker1019	31.281	Marker60314	34.985	Marker48127	26.328	Marker5073	90.246	Marker15448	30.358	Marker5588	54.251
Marker6551	50.075	Marker13684	31.281	Marker6173	34.985	Marker21147	26.328	Marker5072	90.246	Marker8603	30.358	Marker61119	54.832
Marker13264	50.075	Marker60642	31.281	Marker6171	34.985	Marker16554	26.953	Marker59993	91.625	Marker2776	30.358	Marker61120	54.832
Marker14574	50.075	Marker1941	31.281	Marker12585	34.985	Marker16559	26.953	Marker8454	92.31	Marker23504	30.743	Marker703	54.902
Marker6552	50.075	Marker15561	31.281	Marker34225	36.975	Marker60023	26.953	Marker22649	92.886	Marker23101	30.743	Marker26470	55.554
Marker6553	50.075	Marker15562	31.281	Marker61934	36.975	Marker7162	26.953	Marker5074	92.995	Marker23503	30.743	Marker60694	55.554
Marker8002	50.075	Marker2502	31.281	Marker34226	36.975	Marker16557	26.953	Marker8455	93.68	Marker2600	32.193	Marker60695	56.032
Marker9149	50.146	Marker2203	31.281	Marker34227	36.975	Marker7163	26.953	Marker3036	94.265	Marker1817	33.105	Marker62025	56.511
Marker2221	50.146	Marker13065	31.914	Marker59737	36.975	Marker60928	27.586	Marker61171	94.95	Marker34572	33.105	Marker36730	56.76
Marker59818	50.146	Marker28541	31.914	Marker29947	36.975	Marker17513	27.586	Marker61172	94.95	Marker8904	33.105	Marker13254	56.76
Marker8001	50.146	Marker28540	31.914	Marker19331	37.584	Marker60511	27.586	Marker21972	95.06	Marker10429	33.105	Marker700	57.966
Marker20234	52.123	Marker15506	33.294	Marker247	37.584	Marker28846	27.586	Marker11574	95.635	Marker6329	33.105	Marker11249	57.966
Marker524	52.123	Marker24823	33.294	Marker1187	37.584	Marker61655	28.343	Marker60918	95.635	Marker59916	34.016	Marker11248	57.966
Marker24272	52.123	Marker29556	33.294	Marker3645	37.584	Marker59686	29.1	Marker10319	97.719	Marker61529	36.788	Marker11247	57.966
Marker20235	52.123	Marker60241	33.294	Marker59736	37.757	Marker945	29.1	Marker10323	98.404	Marker3925	36.788	Marker701	58.656
Marker8000	52.123	Marker29554	33.294	Marker39685	37.757	Marker60107	29.1	Marker10320	99.089	Marker318	36.788	Marker702	58.656
Marker62076	53.799	Marker29557	33.294	Marker3646	38.539	Marker60826	29.1	Marker30171	99.089	Marker61462	36.788	Marker32531	59.397
Marker193	53.799	Marker8012	33.294	Marker5874	38.539	Marker9708	29.1	Marker60722	99.089	Marker6436	36.788	Marker16642	60.139
Marker62077	53.799	Marker34014	33.294	Marker34224	38.539	Marker60106	29.1	Marker21973	99.317	Marker3001	36.788	Marker907	60.881
Marker195	53.799	Marker687	35.377	Marker17052	40.072	Marker947	29.1	Marker21975	99.317	Marker25937	36.788	Marker61000	61.249
Marker20233	54.1	Marker2772	35.377	Marker61935	40.115	Marker11634	29.1	Marker30172	99.774	Marker319	36.788	Marker6651	63.538
Marker18711	54.1	Marker5634	35.377	Marker61933	40.115	Marker5829	29.1	Marker21974	101.401	Marker59896	36.788	Marker60163	63.538
Marker18712	54.749	Marker2214	35.539	Marker12622	40.115	Marker4730	29.1	Marker5500	101.857	Marker16982	36.788	Marker3382	63.538
Marker2507	56.002	Marker2210	35.539	Marker22135	40.115	Marker61649	29.1	Marker22776	102.542	Marker4637	37.699	Marker36984	63.538
Marker12094	56.002	Marker60239	36.757	Marker24353	43.311	Marker8112	30.171	Marker5273	103.227	Marker16985	38.611	Marker7876	63.538
Marker61352	56.726	Marker5633	36.757	Marker24355	43.311	Marker18388	31.431	Marker5271	103.227	Marker16983	38.611	Marker60889	63.538
Marker24104	56.726	Marker5440	36.757	Marker6617	44.093	Marker7744	31.431	Marker4308	103.485	Marker189	40.446	Marker36983	63.538
Marker24100	56.726	Marker60884	39.555	Marker6446	44.093	Marker7746	32.691	Marker5783	103.912	Marker15083	40.446	Marker7877	63.538
Marker12099	56.726	Marker26404	39.555	Marker6448	44.093	Marker7745	32.691	Marker60266	104.17	Marker50383	40.446	Marker22938	63.881
Marker61353	56.726	Marker15505	39.555	Marker6449	44.523	Marker61968	33.803	Marker60265	104.855	Marker6435	40.446	Marker5818	63.881
Marker61574	56.726	Marker14380	39.797	Marker6447	44.523	Marker61969	33.803	Marker60264	104.855	Marker61317	40.446	Marker13323	64.571
Marker26691	56.726	Marker1654	39.797	Marker24860	45.749	Marker1272	33.951	Marker60267	104.855	Marker60251	40.446	Marker61999	65.26
Marker3844	56.726	Marker13687	39.797	Marker24858	45.749	Marker8111	33.951	Marker60089	105.291	Marker59897	40.446	Marker5819	65.26
Marker61354	56.726	Marker8976	39.797	Marker8226	46.358	Marker61967	34.56	Marker900	105.291	Marker5381	40.576	Marker19708	65.95
Marker2341	57.811	Marker18942	39.797	Marker7552	46.967	Marker33568	34.56	Marker5782	105.291	Marker3924	41.357	Marker3178	66.64
Marker61573	57.811	Marker59245	39.797	Marker6485	46.967	Marker1785	35.211	Marker8409	105.976	Marker4948	41.357	Marker60592	66.64
Marker61571	57.811	Marker6799	39.797	Marker6482	46.967	Marker1660	35.211	Marker61916	105.976	Marker1387	41.357	Marker60729	66.64
Marker8838	58.35	Marker6896	39.797	Marker15467	47.289	Marker20706	35.211	Marker29737	106.234	Marker1118	41.357	Marker61001	67.604
Marker8839	58.35	Marker60534	39.797	Marker36651	48.071	Marker20705	36.471	Marker8410	106.661	Marker1383	41.357	Marker7784	69.061
Marker62198	59.989	Marker15938	39.797	Marker6484	48.194	Marker20708	36.471	Marker8414	106.661	Marker1119	41.357	Marker997	69.061
Marker62197	59.989	Marker13760	40.239	Marker6481	49.421	Marker737	37.097	Marker8415	106.661	Marker59994	41.357	Marker62114	70.397
Marker60825	60.567	Marker14398	41.619	Marker35492	51.267	Marker20709	37.097	Marker60970	106.919	Marker338	41.357	Marker4554	70.397
Marker9163	60.567	Marker26173	43.32	Marker35493	51.267	Marker7735	37.65	Marker59678	107.346	Marker2419	43.397	Marker4552	70.397
Marker1305	61.507	Marker1657	43.32	Marker24354	52.049	Marker740	37.65	Marker60031	107.346	Marker2418	43.397	Marker13951	70.397
Marker9026	61.507	Marker2252	43.32	Marker12635	52.554	Marker60405	37.65	Marker14035	107.604	Marker7594	43.946	Marker13953	70.397
Marker9027	61.507	Marker3239	46.623	Marker24857	52.554	Marker60404	37.65	Marker60358	108.289	Marker61455	43.946	Marker6753	70.397
Marker1895	62.447	Marker5892	46.623	Marker11870	53.624	Marker13437	37.65	Marker60359	108.289	Marker26857	44.495	Marker9682	70.397
Marker20378	63.337	Marker2465	46.623	Marker7909	54.407	Marker14333	37.723	Marker61730	108.726	Marker27296	44.495	Marker3840	70.397
Marker61726	63.337	Marker6802	46.842	Marker11871	54.407	Marker61863	37.723	Marker7544	108.974	Marker7598	44.495	Marker18060	70.397
Marker3496	63.387	Marker6897	46.842	Marker7910	54.407	Marker60406	37.723	Marker7542	108.974	Marker7596	44.495	Marker60085	70.397
Marker19069	63.387	Marker6901	46.842	Marker7908	54.407	Marker33090	38.348	Marker7541	108.974	Marker8779	44.495	Marker15014	70.397
Marker19067	63.387	Marker6898	46.842	Marker11873	54.988	Marker27611	40.252	Marker61729	110.105	Marker8780	44.495	Marker6311	70.397
Marker5179	63.387	Marker61361	46.842	Marker36652	56.757	Marker8654	40.252	Marker7540	110.353	Marker7595	44.495	Marker10883	70.616
Marker5178	63.387	Marker15937	46.842	Marker8105	56.941	Marker27610	40.252	Marker59677	111.484	Marker26858	44.495	Marker2020	70.616
Marker7564	63.876	Marker1018	46.842	Marker8104	56.941	Marker566	40.878	Marker59680	111.484	Marker15712	46.044	Marker10084	70.616
Marker61727	63.876	Marker3921	46.842	Marker41055	60.345	Marker39020	41.503	Marker1179	112.437	Marker15384	46.044	Marker60289	70.836
Marker14170	64.327	Marker57889	46.842	Marker23493	60.345	Marker568	42.129	Marker59679	112.864	Marker7597	46.044	Marker60290	70.836
Marker5180	64.327	Marker3115	47.527	Marker13174	61.648	Marker18380	42.755	Marker7545	113.816	Marker5739	46.044	Marker6705	70.836
Marker3497	65.267	Marker59244	47.527	Marker23452	61.648	Marker18379	42.755	Marker7543	114.501	Marker59917	46.044	Marker10273	70.836
Marker5181	65.267	Marker28098	47.527	Marker401	61.648	Marker7734	42.755	Marker489	114.947	Marker15636	47.879	Marker10272	70.836
Marker5177	66.208	Marker26931	47.527	Marker23495	62.88	Marker18381	44.015	Marker62395	115.881	Marker61774	48.79	Marker16171	70.836
Marker3760	70.048	Marker1565	47.527	Marker21268	62.88	Marker738	44.015	Marker774	116.327	Marker59910	50.625	Marker62053	72.172
Marker22207	70.988	Marker32935	47.527	Marker59671	63.713	Marker18382	44.015	Marker10637	116.565	Marker59911	50.625	Marker19559	72.172
Marker444	70.988	Marker2501	47.527	Marker59670	63.713	Marker20707	44.015	Marker488	117.012	Marker60167	50.625	Marker673	72.172
Marker30222	72.882	Marker1088	47.527	Marker15952	65.391	Marker739	45.394	Marker7308	117.697	Marker1922	50.625	Marker8443	72.172
Marker58633	73.822	Marker2771	48.002	Marker9279	65.391	Marker8113	45.394	Marker771	117.697	Marker1925	50.625	Marker61089	72.172
Marker3759	73.822	Marker349	48.002	Marker19261	65.391	Marker741	45.394	Marker10941	119.78	Marker1923	50.625	Marker60154	72.172
Marker6064	73.822	Marker2773	48.002	Marker12201	65.391	Marker550	46.796	Marker10942	119.78	Marker59908	50.625	Marker62269	72.172
Marker11115	79.666	Marker60516	48.212	Marker9281	65.391	Marker7781	47.493	Marker60309	120.088	Marker59909	50.625	Marker60981	72.172
Marker11116	79.666	Marker21608	48.897	Marker62152	65.391	Marker61148	48.895	Marker60310	120.773	Marker60165	51.537	Marker60113	72.172
Marker58634	80.606	Marker348	49.382	Marker41054	65.391	Marker59973	48.895	Marker1658	121.864	Marker60544	51.537	Marker22940	72.514
Marker17251	80.606	Marker61763	49.382	Marker15951	65.391	Marker61149	48.895	Marker61294	123.243	Marker12636	51.634	Marker22939	72.514
Marker59	81.546	Marker4133	49.582	Marker1434	65.391	Marker59974	53.223	Marker61296	123.243	Marker16804	52.448	Marker9480	72.514
Marker17250	81.546	Marker4134	49.582	Marker41056	65.391	Marker59975	53.223	Marker18836	123.243	Marker1921	52.448	Marker22937	72.514
Marker9522	82.735	Marker28096	49.582	Marker15957	67.069	Marker13610	54.164	Marker25362	123.571	Marker15710	53.359	Marker9478	72.514
Marker23329	82.735	Marker14912	49.582	Marker15953	67.069	Marker60762	54.164	Marker60673	123.928	Marker60166	53.359	Marker7787	72.514
Marker62102	82.735	Marker21858	50.067	Marker15956	67.069	Marker58407	54.838	Marker61926	125.308	Marker16805	53.359	Marker280	72.514
Marker62107	82.735	Marker21857	50.067	Marker15950	67.069	Marker60761	54.838	Marker18837	125.308	Marker15713	53.359	Marker281	72.514
Marker5716	82.735	Marker2464	50.067	Marker41853	67.069	Marker16529	54.838	Marker2196	125.308	Marker4808	53.875	Marker7368	72.514
Marker3285	82.735	Marker2466	50.067	Marker15955	67.069	Marker4770	56.195	Marker3820	125.308	Marker15385	54.271	Marker6309	74.077
Marker61832	82.735	Marker7663	50.067	Marker15954	67.069	Marker59870	56.195	Marker61925	125.308	Marker62310	55.182	Marker3553	74.077
Marker61175	82.735	Marker31516	50.961	Marker60250	68.747	Marker60763	57.552	Marker61223	125.655	Marker61010	55.182	Marker5419	74.077
Marker5968	82.735	Marker15797	51.646	Marker592	68.747	Marker60900	57.552	Marker61224	125.655	Marker60853	55.544	Marker6312	74.077
Marker60	83.44	Marker60905	51.646	Marker41854	68.747	Marker3499	57.552	Marker798	125.993	Marker450	56.093	Marker13952	74.077
Marker14415	83.44	Marker60906	51.646	Marker291	68.747	Marker16530	57.552	Marker60834	125.993	Marker60924	56.093	Marker31236	75.64
Marker4191	83.82	Marker8973	51.646	Marker29936	69.58	Marker60243	57.552	Marker799	125.993	Marker61432	56.093	Marker3517	75.64
Marker14794	83.82	Marker185	52.331	Marker1999	69.58	Marker60901	57.552	Marker28971	125.993	Marker62038	56.093	Marker16664	75.64
Marker11021	83.82	Marker10315	53.016	Marker14	70.413	Marker60902	57.552	Marker22769	127.372	Marker7191	56.093	Marker33766	75.64
Marker58085	84.38	Marker15583	53.016	Marker4922	70.413	Marker60244	58.226	Marker2355	127.738	Marker60854	56.093	Marker60686	76.228
Marker62105	84.38	Marker18989	53.701	Marker15	70.413	Marker60759	58.226	Marker4794	128.057	Marker15711	57.262	Marker493	76.228
Marker6970	84.905	Marker10316	54.386	Marker13175	70.413	Marker1503	59.583	Marker15364	128.423	Marker15386	57.262	Marker495	76.228
Marker31339	84.905	Marker8381	55.071	Marker13173	70.413	Marker15233	59.583	Marker1346	129.108	Marker60861	57.262	Marker866	77.412
Marker3282	84.905	Marker21026	55.071	Marker4924	70.413	Marker15231	59.583	Marker11066	129.436	Marker30726	57.776	Marker13800	77.412
Marker62023	84.905	Marker3237	55.756	Marker4918	70.413	Marker15230	59.583	Marker3254	129.793	Marker60860	57.842	Marker6310	77.412
Marker27535	84.905	Marker61357	55.756	Marker60342	71.247	Marker1504	59.583	Marker62288	130.121	Marker60925	58.422	Marker5728	77.412
Marker60523	84.905	Marker3240	55.756	Marker2104	71.247	Marker61777	59.583	Marker3251	130.478	Marker4401	58.612	Marker8694	77.412
Marker60525	84.905	Marker21027	55.756	Marker2691	71.247	Marker62123	60.257	Marker11956	131.501	Marker4400	58.612	Marker60288	78
Marker62106	84.905	Marker3238	55.756	Marker62380	73.781	Marker61779	60.931	Marker59662	131.501	Marker59839	58.612	Marker8695	78
Marker3284	84.905	Marker21025	55.756	Marker61585	75.129	Marker663	60.931	Marker11067	131.501	Marker62205	58.612	Marker1594	78.134
Marker22039	84.905	Marker61764	55.756	Marker4921	75.459	Marker666	60.931	Marker61909	131.501	Marker30730	59.448	Marker898	78.134
Marker6973	84.905	Marker3674	55.756	Marker21103	75.459	Marker60136	61.605	Marker11054	131.857	Marker60897	59.448	Marker8139	78.134
Marker61177	84.905	Marker3241	55.756	Marker1086	75.711	Marker664	61.605	Marker61113	132.186	Marker4110	59.591	Marker8685	78.134
Marker60526	84.905	Marker61356	55.756	Marker28328	75.711	Marker668	61.605	Marker11059	132.542	Marker4112	59.591	Marker1597	78.134
Marker16653	84.905	Marker61358	56.098	Marker9413	75.711	Marker665	61.605	Marker59612	132.871	Marker60926	60.283	Marker638	78.588
Marker5719	84.905	Marker61355	56.098	Marker60382	75.711	Marker667	61.605	Marker5781	132.871	Marker30729	60.283	Marker20386	78.588
Marker61829	85.32	Marker3236	56.098	Marker61814	75.711	Marker2097	61.605	Marker30168	132.871	Marker30731	61.119	Marker61801	78.588
Marker32307	85.32	Marker24977	58.539	Marker24794	75.711	Marker188	61.605	Marker5780	135.668	Marker62209	61.955	Marker4821	78.588
Marker7506	86.26	Marker551	58.539	Marker61813	75.711	Marker2098	62.279	Marker11044	135.668	Marker62207	61.955	Marker59722	78.955
Marker11276	86.26	Marker552	58.539	Marker1203	75.711	Marker2099	62.279	Marker57014	135.668	Marker61840	61.955	Marker13322	78.955
Marker9831	87.106	Marker4640	58.539	Marker18876	75.711	Marker11389	64.33	Marker61983	136.065	Marker4113	62.575	Marker8041	78.955
Marker1827	87.106	Marker4638	58.539	Marker59846	75.711	Marker61239	65.003	Marker3252	136.065	Marker21997	62.791	Marker60349	78.955
Marker9832	87.106	Marker340	58.539	Marker8655	75.711	Marker61237	65.003	Marker9038	136.353	Marker59837	63.626	Marker16787	78.955
Marker5101	87.106	Marker339	58.539	Marker1003	75.711	Marker61238	65.677	Marker9040	136.353	Marker21995	63.626	Marker60980	78.955
Marker14796	87.106	Marker486	58.539	Marker7956	75.711	Marker4592	66.351	Marker7455	136.75	Marker21998	63.626	Marker9397	79.773
Marker59967	87.106	Marker341	58.539	Marker6891	75.711	Marker4593	67.025	Marker61162	137.435	Marker62210	64.462	Marker21540	79.773
Marker62361	87.106	Marker22444	59.84	Marker62391	75.711	Marker12853	69.778	Marker10321	137.733	Marker23020	64.462	Marker62001	79.773
Marker13973	87.106	Marker342	59.84	Marker14930	76.292	Marker12854	71.829	Marker61163	138.12	Marker23019	64.462	Marker7192	79.773
Marker5100	87.644	Marker61359	60.486	Marker60381	76.292	Marker28907	73.186	Marker8376	138.418	Marker62211	64.462	Marker18061	79.773
Marker19066	88.154	Marker61765	60.486	Marker2809	76.292	Marker13286	74.543	Marker10318	139.797	Marker60725	65.298	Marker18058	79.773
Marker8848	88.154	Marker24302	60.486	Marker44731	76.292	Marker14851	74.543	Marker1832	141.881	Marker20420	65.559	Marker3906	79.775
Marker11275	88.154	Marker903	60.486	Marker20928	76.292	Marker3040	75.217	Marker1834	141.881	Marker21996	67.84	Marker25856	79.775
Marker19065	88.154	Marker22446	60.486	Marker44730	76.292	Marker2912	75.217	Marker1831	142.566	Marker770	69.523	Marker3183	79.775
Marker46026	88.154	Marker3437	61.517	Marker402	76.292	Marker62301	75.217	Marker1833	142.566	Marker14251	69.798	Marker6650	79.775
Marker19068	88.154	Marker3438	62.247	Marker61202	76.292	Marker61242	83.193	Marker836	143.124	Marker16769	70.359	Marker60827	79.775
Marker4190	88.183	Marker61226	62.247	Marker13172	76.893	Marker696	83.193	Marker60919	143.251	Marker10064	70.359	Marker920	79.775
Marker18959	89.094	Marker61209	62.976	Marker60096	76.893	Marker1020	83.193	Marker6871	143.251	Marker16766	70.359	Marker61040	79.775
Marker27723	89.268	Marker61225	62.976	Marker4548	76.893	Marker1270	83.193	Marker12260	143.251	Marker2921	70.359	Marker4650	79.775
Marker5717	89.268	Marker22445	62.976	Marker8053	76.893	Marker125	83.193	Marker61659	143.251	Marker10063	70.359	Marker32518	79.775
Marker61227	89.268	Marker4639	64.444	Marker60330	76.893	Marker126	83.193	Marker61085	143.251	Marker60580	70.378	Marker38571	79.775
Marker59915	89.268	Marker27241	65.912	Marker12093	76.893	Marker61463	84.551	Marker9686	143.936	Marker16767	70.959	Marker27934	79.775
Marker31337	89.268	Marker3436	67.38	Marker2613	76.893	Marker62192	85.225	Marker61345	143.936	Marker16768	71.195	Marker9646	79.775
Marker4836	89.268	Marker27240	67.38	Marker9860	76.893	Marker10953	85.898	Marker3201	144.621	Marker6257	71.195	Marker60249	79.775
Marker59665	89.268	Marker3439	67.38	Marker2692	78.719	Marker10952	85.898	Marker9685	145.306	Marker14790	71.539	Marker16636	79.775
Marker60524	89.268	Marker20260	67.38	Marker21840	78.719	Marker61737	85.898	Marker60114	145.306	Marker1131	72.031	Marker61413	79.775
Marker28051	89.268	Marker3440	67.38	Marker3485	79.76	Marker58463	85.898	Marker13252	146.647	Marker5069	72.031	Marker3180	79.775
Marker49674	89.268	Marker2623	68.075	Marker2054	79.76	Marker3465	86.572	Marker61078	146.647	Marker6258	72.031	Marker9392	79.775
Marker59744	89.268	Marker2621	68.769	Marker2694	79.76	Marker62193	86.572	Marker12669	146.685	Marker6256	72.031	Marker2554	79.775
Marker23331	89.268	Marker2622	68.769	Marker60813	79.76	Marker8228	86.572	Marker61006	146.685	Marker5068	72.031	Marker21211	79.775
Marker62104	89.268	Marker61561	70.882	Marker290	79.76	Marker60131	86.572	Marker241	146.685	Marker4568	72.031	Marker4158	79.775
Marker38889	90.987	Marker62108	70.882	Marker60101	79.76	Marker40233	86.572	Marker60784	146.685	Marker5067	73.714	Marker30750	79.775
Marker46025	90.987	Marker22712	71.576	Marker19891	79.76	Marker58464	86.572	Marker59751	147.37	Marker62140	73.909	Marker4649	79.775
Marker8847	90.987	Marker7546	71.581	Marker5615	79.76	Marker4724	86.572	Marker4803	147.37	Marker14791	73.909	Marker4025	79.775
Marker27721	91.468	Marker2624	71.581	Marker20927	79.76	Marker58460	86.572	Marker11659	148.026	Marker10685	74.489	Marker6773	79.775
Marker1008	91.468	Marker2626	73.689	Marker11929	79.76	Marker3466	86.572	Marker12671	148.055	Marker3831	74.549	Marker21855	79.775
Marker62	91.468	Marker2625	73.689	Marker2428	79.76	Marker7523	86.572	Marker3720	148.055	Marker24327	75.658	Marker417	79.775
Marker3792	91.468	Marker2627	74.383	Marker6477	79.76	Marker59775	86.572	Marker13188	148.055	Marker1029	76.232	Marker7369	79.775
Marker7503	92.88	Marker18445	75.782	Marker13176	79.76	Marker16918	86.572	Marker1093	148.055	Marker2306	76.238	Marker5667	80.957
Marker7504	92.88	Marker60797	75.782	Marker3736	79.76	Marker39367	86.572	Marker59691	148.055	Marker2135	76.238	Marker59872	80.957
Marker6985	92.88	Marker15901	75.782	Marker2612	79.76	Marker3467	86.572	Marker6138	148.055	Marker452	76.238	Marker1124	80.957
Marker29187	92.88	Marker2629	75.782	Marker21839	79.76	Marker108	86.572	Marker1091	148.74	Marker18515	76.818	Marker60689	80.957
Marker18960	92.88	Marker2628	75.782	Marker1527	80.802	Marker58461	87.246	Marker837	149.405	Marker14249	76.818	Marker1126	80.957
Marker7507	92.88	Marker18446	75.782	Marker23342	80.802	Marker58462	87.246	Marker61459	149.425	Marker18517	76.818	Marker59866	81.426
Marker61826	93.669	Marker41113	76.665	Marker61603	80.802	Marker10954	87.246	Marker39303	150.11	Marker28911	77.916	Marker60727	81.426
Marker3283	93.669	Marker6460	77.482	Marker3698	81.145	Marker3276	87.428	Marker1208	150.11	Marker61403	77.916	Marker61490	81.545
Marker3281	93.669	Marker6648	77.482	Marker9411	81.145	Marker7935	87.428	Marker28252	150.11	Marker28914	77.916	Marker9390	81.545
Marker28050	93.669	Marker13701	77.482	Marker42482	81.145	Marker7329	87.428	Marker11218	150.795	Marker28913	77.916	Marker9393	81.545
Marker4192	94.754	Marker15903	78.445	Marker58602	81.145	Marker29291	87.428	Marker6685	151.489	Marker3740	78.584	Marker7954	81.545
Marker59966	94.754	Marker15902	78.445	Marker61586	81.145	Marker62304	87.428	Marker11102	152.174	Marker1028	79.599	Marker9391	81.545
Marker3330	95.293	Marker7547	78.445	Marker10642	81.487	Marker28123	87.428	Marker61788	152.174	Marker3738	79.599	Marker5668	82.133
Marker62362	95.831	Marker6459	79.329	Marker20926	81.487	Marker12869	87.428	Marker6680	152.174	Marker27275	81.282	Marker3396	82.133
Marker5098	95.831	Marker6455	80.213	Marker10641	81.487	Marker60013	87.428	Marker838	153.017	Marker27276	81.282	Marker23733	82.133
Marker14171	96.37	Marker18442	80.213	Marker1946	81.83	Marker7831	87.428	Marker62330	153.929	Marker27274	81.282	Marker13482	82.133
Marker14795	96.37	Marker18443	80.213	Marker61583	81.83	Marker12850	87.428	Marker244	153.929	Marker3739	82.191	Marker13481	82.133
Marker10721	96.721	Marker1542	80.213	Marker29732	81.83	Marker32371	87.428	Marker59964	153.929	Marker3737	82.191	Marker7409	82.133
Marker60425	96.721	Marker1544	81.993	Marker60542	82.172	Marker22758	87.428	Marker61007	153.929	Marker4569	82.965	Marker23732	82.133
Marker2409	96.721	Marker6975	83.451	Marker2523	82.172	Marker9117	87.428	Marker11103	154.506	Marker758	83.359	Marker7410	82.133
Marker7938	96.721	Marker6976	83.451	Marker2568	82.862	Marker7326	87.428	Marker61008	154.506	Marker6255	83.801	Marker4988	82.133
Marker8460	96.721	Marker6457	84.011	Marker60682	82.862	Marker60014	87.428	Marker10154	154.506	Marker1132	83.801	Marker5345	82.246
Marker60757	96.721	Marker23328	85.137	Marker60380	82.862	Marker62305	87.428	Marker60105	154.506	Marker1130	83.801	Marker16494	82.246
Marker21577	96.721	Marker1174	85.604	Marker2520	82.862	Marker8852	87.428	Marker839	155.581	Marker3185	83.939	Marker20346	82.721
Marker32309	96.721	Marker19811	85.696	Marker1109	82.862	Marker21761	87.428	Marker70	155.581	Marker62007	83.939	Marker48380	83.309
Marker10720	96.721	Marker4630	86.487	Marker59675	82.862	Marker4717	87.428	Marker61982	155.667	Marker62008	84.52	Marker26537	83.309
Marker26634	96.909	Marker27405	86.487	Marker2565	83.547	Marker5751	87.428	Marker3255	155.667	Marker5070	85.484	Marker61993	83.309
Marker20808	100.561	Marker407	87.98	Marker62054	83.547	Marker61166	87.428	Marker61164	155.667	Marker5071	85.484	Marker13950	83.897
Marker14413	100.561	Marker59748	88.267	Marker4478	83.547	Marker10886	87.428	Marker62338	156.829	Marker27277	85.484	Marker16663	83.897
Marker20806	100.561	Marker4676	88.267	Marker14929	83.547	Marker61080	87.428	Marker15612	156.829	Marker8889	85.688	Marker5638	83.897
Marker49241	100.561	Marker728	89.68	Marker59573	83.547	Marker1906	87.428	Marker10354	156.829	Marker8885	85.688	Marker9003	83.897
Marker14417	100.561	Marker24512	90.047	Marker1959	83.547	Marker26592	87.428	Marker62337	156.829	Marker8887	85.688	Marker16666	83.897
Marker49244	100.561	Marker24513	90.047	Marker4476	83.547	Marker5658	87.428	Marker26742	157.278	Marker8886	85.688	Marker29795	83.897
Marker49242	100.561	Marker16149	90.931	Marker1681	83.547	Marker8851	87.428	Marker61984	157.406	Marker8888	85.688	Marker16665	83.897
Marker5900	100.561	Marker727	91.381	Marker62055	83.547	Marker60009	87.428	Marker840	157.983	Marker381	88.672	Marker19707	83.897
Marker59666	100.561	Marker40420	91.815	Marker62175	83.547	Marker973	87.428	Marker4232	158.976	Marker62013	89.841	Marker16200	83.897
Marker20807	100.561	Marker40421	91.815	Marker60100	83.547	Marker22757	87.428	Marker57682	159.144	Marker62014	89.841	Marker3635	85.994
Marker49243	100.561	Marker28194	92.507	Marker62172	83.547	Marker60715	87.428	Marker29927	159.144	Marker62017	89.841	Marker2575	87.028
Marker32308	100.561	Marker10622	92.507	Marker33615	84.463	Marker9114	87.428	Marker13189	159.144	Marker62012	89.841	Marker62000	87.028
Marker5901	101.502	Marker60220	92.699	Marker23369	84.463	Marker61838	87.428	Marker7627	159.144	Marker61553	91.009	Marker62116	87.886
Marker60907	102.045	Marker60222	93.583	Marker14931	84.463	Marker15802	87.428	Marker60705	159.144	Marker34895	91.59	Marker8844	88.175
Marker16654	102.045	Marker1505	94.467	Marker5557	84.933	Marker1803	87.428	Marker60707	159.144	Marker34896	91.59	Marker21591	88.175
Marker6972	102.045	Marker60221	94.467	Marker61886	84.933	Marker37007	87.428	Marker5650	159.144	Marker42425	91.59	Marker61109	88.745
Marker35707	103.395	Marker62358	94.791	Marker59696	84.933	Marker2696	87.428	Marker62133	159.144	Marker60355	91.59	Marker61326	88.745
Marker58988	103.395	Marker22481	95.35	Marker61125	84.933	Marker27152	87.428	Marker16934	159.144	Marker39427	91.59	Marker61563	90.093
Marker35708	103.395	Marker1033	95.35	Marker10255	84.933	Marker7656	87.92	Marker62393	159.144	Marker59970	91.59	Marker61800	93.331
Marker2427	103.395	Marker59918	95.35	Marker22614	84.933	Marker29394	87.92	Marker61687	159.144	Marker59905	94.683	Marker3460	93.331
Marker5902	103.395	Marker7186	95.863	Marker7955	84.933	Marker23023	87.92	Marker31073	159.144	Marker28912	94.683	Marker1125	93.331
Marker35709	103.395	Marker5386	96.375	Marker21808	84.933	Marker61021	88.124	Marker23086	159.144	Marker59982	96.574	Marker10274	93.331
Marker5899	103.395	Marker9592	96.383	Marker61268	84.933	Marker62186	88.124	Marker57683	159.144	Marker60354	96.574	Marker7367	93.331
Marker35710	103.395	Marker60553	96.383	Marker28327	84.933	Marker62306	88.124	Marker21788	159.144	Marker61406	96.574	Marker60291	93.331
Marker60651	104.816	Marker56506	96.383	Marker61584	86.32	Marker15071	88.124	Marker60706	159.144	Marker59983	96.574	Marker2189	93.331
Marker58987	104.816	Marker28664	96.888	Marker56739	86.32	Marker60011	88.124	Marker28250	159.144	Marker61404	96.574	Marker15793	93.331
Marker60123	107.016	Marker12935	96.888	Marker5788	86.32	Marker3041	88.124	Marker11104	159.144	Marker61405	96.574	Marker4028	93.331
Marker60124	107.016	Marker61867	96.888	Marker61973	86.32	Marker60206	88.124	Marker4686	159.144	Marker42424	97.634	Marker61039	93.331
Marker20162	108.101	Marker8552	96.888	Marker20428	86.32	Marker61079	88.124	Marker11101	159.721	Marker7922	97.634	Marker61222	93.331
Marker20160	108.101	Marker60552	97.415	Marker23344	86.32	Marker62277	88.124	Marker61337	159.819	Marker28915	98.641	Marker7788	93.331
Marker2106	109.186	Marker698	97.415	Marker24450	86.32	Marker1857	88.124	Marker4328	159.819	Marker61922	98.641	Marker7056	93.331
Marker2105	109.186	Marker6192	97.415	Marker29735	86.32	Marker5750	88.124	Marker733	159.819	Marker60075	98.694	Marker62271	93.331
Marker9702	109.725	Marker60554	97.415	Marker8658	86.32	Marker15073	88.124	Marker13192	159.819	Marker383	98.694	Marker4026	93.331
Marker33628	109.725	Marker12675	97.415	Marker2690	86.32	Marker60010	88.124	Marker5017	159.819	Marker59906	98.694	Marker25467	93.331
Marker60125	110.264	Marker61742	98.981	Marker4547	86.32	Marker6090	88.124	Marker2217	159.819	Marker382	98.694	Marker62270	93.331
Marker61509	110.264	Marker61740	98.981	Marker4919	86.32	Marker21846	88.124	Marker59969	160.662	Marker60074	98.694	Marker60730	93.331
Marker15437	110.264	Marker9589	99.494	Marker17647	86.32	Marker62027	88.124	Marker15603	160.662	Marker59907	98.694	Marker62268	93.331
Marker8048	110.264	Marker62290	99.494	Marker62410	86.32	Marker6089	88.124	Marker60862	160.662	Marker12304	98.694	Marker8441	93.331
Marker8049	110.264	Marker61767	99.494	Marker2693	86.32	Marker61051	88.124	Marker3959	160.662	Marker12603	100.18	Marker7681	93.331
Marker61511	110.264	Marker22477	99.494	Marker9412	87.719	Marker5446	88.124	Marker60866	160.662	Marker11460	100.828	Marker3895	93.331
Marker33627	110.264	Marker61768	99.494	Marker1313	89.118	Marker1907	88.82	Marker13986	160.662	Marker11461	100.828	Marker5720	93.331
Marker33629	110.264	Marker62359	99.494	Marker15407	89.118	Marker61839	88.82	Marker59750	160.662	Marker170	100.828	Marker7674	93.331
Marker15436	110.264	Marker1071	100.94	Marker2052	91.921	Marker8855	88.82	Marker23631	160.662	Marker62015	100.828	Marker11617	93.331
Marker17712	110.264	Marker1221	100.94	Marker2825	91.921	Marker7300	89.971	Marker4685	160.662	Marker5675	101.199	Marker10348	93.331
Marker61510	112.308	Marker61627	100.94	Marker2826	91.921	Marker59720	89.971	Marker1236	160.662	Marker5677	101.199	Marker4156	93.331
Marker61512	113.324	Marker61387	100.94	Marker59729	93.029	Marker1135	89.971	Marker61076	160.662	Marker34894	101.888	Marker8442	93.331
Marker14110	114.039	Marker4693	101.486	Marker60451	93.029	Marker60133	89.971	Marker59968	160.662	Marker7923	102.948	Marker61088	93.673
Marker60788	115.368	Marker4692	101.486	Marker16175	93.58	Marker7302	89.971	Marker61077	160.662	Marker62016	105.082	Marker115	93.673
Marker60790	116.384	Marker56	102.141	Marker591	93.58	Marker61464	89.971	Marker4688	160.662	Marker62019	105.082	Marker61562	93.673
Marker60787	116.384	Marker60466	102.141	Marker1936	93.58	Marker1134	89.971	Marker4687	160.662	Marker62018	105.082	Marker9575	93.673
Marker60789	116.384	Marker57	102.141	Marker3700	94.13	Marker61365	89.971	Marker5861	160.662	Marker11462	105.082	Marker61312	93.673
Marker11896	117.815	Marker61131	102.386	Marker403	94.68	Marker60132	89.971	Marker62394	160.662	Marker2941	106.024	Marker9573	93.673
Marker61216	118.428	Marker61998	102.386	Marker4923	94.68	Marker60135	89.971	Marker1260	160.662	Marker59848	106.53	Marker4553	93.673
Marker61212	118.428	Marker4691	102.386	Marker17646	94.68	Marker5981	89.971	Marker240	160.662	Marker60441	107.036	Marker6754	93.673
Marker61213	118.428	Marker59920	102.386	Marker23343	94.68	Marker60116	90.645	Marker21499	160.883	Marker60440	107.036	Marker9681	93.673
Marker61215	118.428	Marker61615	102.386	Marker2051	94.68	Marker60572	90.645	Marker21501	160.883	Marker60439	107.036	Marker18059	93.673
Marker61214	118.428	Marker60467	102.796	Marker24844	94.68	Marker7539	90.645	Marker21498	160.883	Marker4705	108.306	Marker60276	94.363
Marker17810	120.473	Marker60469	102.796	Marker5789	95.37	Marker54786	90.645	Marker5941	161.46	Marker4704	110.44	Marker467	94.363
Marker59858	120.473	Marker60468	102.796	Marker2817	95.712	Marker61364	90.645	Marker5944	161.46	Marker7921	111.5	Marker60690	94.363
Marker59861	120.473	Marker3104	102.796	Marker17660	95.712	Marker60227	91.319	Marker61988	161.505	Marker61378	112.56	Marker494	94.363
Marker59857	121.163	Marker14350	103.45	Marker61301	95.712	Marker972	91.319	Marker11992	161.505	Marker20746	113.619	Marker116	94.363
Marker59863	122.195	Marker7085	103.45	Marker4920	95.712	Marker17174	91.993	Marker61335	161.505	Marker62378	113.619	Marker60688	94.363
Marker59860	123.594	Marker60065	103.45	Marker5802	95.712	Marker2421	91.993	Marker2216	161.505	Marker30401	113.619	Marker492	94.363
Marker33048	123.594	Marker10655	103.45	Marker2053	95.712	Marker3884	91.993	Marker9379	162.037	Marker16005	114.679	Marker1258	94.363
Marker6983	123.594	Marker10652	103.45	Marker1314	95.712	Marker17175	91.993	Marker20064	162.037	Marker20744	114.679	Marker9479	94.363
Marker17809	123.594	Marker12936	103.45	Marker2614	95.712	Marker10737	91.993	Marker29438	162.037	Marker16004	114.679	Marker9477	94.363
Marker59862	126.096	Marker10653	103.45	Marker62389	95.712	Marker60582	91.993	Marker61789	162.037	Marker61635	119.008	Marker61633	94.363
Marker7386	126.096	Marker61766	103.45	Marker17328	95.712	Marker8828	92.401	Marker16333	162.037	Marker18025	119.008	Marker61632	94.363
Marker17807	126.096	Marker24404	103.832	Marker62411	95.712	Marker60557	92.401	Marker61539	162.037	Marker2117	119.008	Marker20535	94.363
Marker17808	126.096	Marker59986	103.832	Marker3484	95.712	Marker20452	92.401	Marker6682	162.037	Marker37918	119.464	Marker12439	94.363
Marker59859	128.537	Marker61625	104.55	Marker2521	95.712	Marker6120	92.401	Marker950	162.037	Marker8145	119.97	Marker60687	94.363
Marker61587	128.537	Marker4198	104.55	Marker60701	95.712	Marker20454	92.401	Marker5287	162.037	Marker1370	119.97	Marker466	94.363
Marker51915	129.278	Marker17962	104.55	Marker62203	95.712	Marker2732	92.401	Marker6683	162.037	Marker13090	119.97	Marker8042	94.363
Marker61382	129.278	Marker59921	104.55	Marker60684	95.712	Marker61963	92.666	Marker61787	162.037	Marker60152	119.97	Marker34287	94.363
Marker51913	129.278	Marker23425	104.55	Marker2569	96.745	Marker7537	92.666	Marker6629	162.037	Marker711	119.97	Marker7789	94.363
Marker51916	129.278	Marker18309	104.769	Marker7238	96.745	Marker7800	92.666	Marker60782	162.347	Marker27373	119.97	Marker3907	94.363
Marker11968	129.278	Marker15523	104.769	Marker13298	96.745	Marker131	93.34	Marker21078	162.347	Marker62158	119.97	Marker3908	94.363
Marker51914	130.019	Marker5007	104.769	Marker12195	96.745	Marker61363	93.34	Marker242	162.347	Marker6142	119.97	Marker1948	95.053
Marker12572	130.019	Marker61932	105.424	Marker8659	97.777	Marker61366	94.014	Marker13985	162.347	Marker4856	120.476	Marker9410	95.566
Marker6984	131.137	Marker25666	105.424	Marker29938	97.777	Marker61367	94.014	Marker243	162.347	Marker14827	123.337	Marker29802	95.566
Marker62341	131.137	Marker60839	105.424	Marker62381	98.119	Marker61466	94.014	Marker60104	162.347	Marker6111	123.621	Marker8043	95.566
Marker33049	131.773	Marker25663	105.424	Marker60543	98.462	Marker61465	94.014	Marker1238	162.347	Marker6110	124.127	Marker2358	95.566
Marker2571	131.773	Marker59841	105.424	Marker699	98.462	Marker8736	94.688	Marker60455	162.614	Marker14363	125.471	Marker20534	97.127
Marker516	131.773	Marker5808	105.424	Marker29937	99.151	Marker25247	94.688	Marker16994	162.614	Marker61168	125.471	Marker7785	97.127
Marker2570	133.055	Marker60840	105.424	Marker1947	99.151	Marker16919	94.688	Marker62335	162.614	Marker4056	125.471	Marker61904	97.127
Marker695	134.337	Marker62101	105.424	Marker2522	99.151	Marker1585	94.688	Marker3796	162.614	Marker9458	126.531	Marker7783	97.127
Marker2573	134.974	Marker60017	105.424	Marker1219	99.151	Marker1586	94.688	Marker62339	162.614	Marker39548	126.531	Marker468	97.127
Marker693	136.255	Marker3649	105.424	Marker60129	99.494	Marker362	95.362	Marker15610	162.614	Marker5420	126.531	Marker13797	97.127
Marker25881	136.255	Marker61042	105.424	Marker22616	100.095	Marker15695	95.362	Marker20065	163.19	Marker12618	126.73	Marker3256	97.127
Marker12570	136.255	Marker1849	106.079	Marker8656	100.095	Marker7103	95.362	Marker6681	163.19	Marker4858	126.73	Marker59723	97.127
Marker22349	136.255	Marker3105	106.079	Marker30187	100.29	Marker59778	95.362	Marker16334	163.19	Marker7382	127.235	Marker20878	97.127
Marker12957	136.255	Marker5216	106.079	Marker25014	103.544	Marker39366	95.362	Marker11219	163.19	Marker13095	127.235	Marker1127	97.127
Marker12954	136.255	Marker61257	106.734	Marker2566	105.148	Marker7105	95.362	Marker26076	163.19	Marker8148	127.235	Marker20537	97.127
Marker53558	136.809	Marker2640	106.734	Marker16052	105.148	Marker7536	95.362	Marker18967	163.19	Marker36041	127.235	Marker62115	97.127
Marker60617	137.363	Marker60066	106.734	Marker16046	105.994	Marker6749	95.982	Marker949	163.19	Marker13530	127.235	Marker60212	98.888
Marker61056	137.363	Marker24816	106.734	Marker16047	105.994	Marker13287	95.982	Marker61334	163.19	Marker1558	127.235	Marker899	98.888
Marker1247	138.062	Marker60718	106.734	Marker1331	107.001	Marker4205	95.982	Marker20063	163.19	Marker9593	127.235	Marker4822	99.23
Marker25880	138.062	Marker20752	106.734	Marker30413	107.001	Marker5139	95.982	Marker7460	163.19	Marker59710	127.235	Marker61980	99.23
Marker1248	138.062	Marker61086	106.734	Marker1332	107.001	Marker27151	95.982	Marker31145	163.19	Marker62156	127.235	Marker5505	99.23
Marker12955	138.959	Marker9401	106.734	Marker2567	112.639	Marker62302	95.982	Marker1209	163.19	Marker21067	127.235	Marker17215	101.359
Marker1245	138.959	Marker11906	106.734	Marker4118	112.639	Marker970	95.982	Marker61336	163.19	Marker13094	127.235	Marker3905	101.359
Marker779	138.959	Marker4078	106.734	Marker62173	114.492	Marker20459	95.982	Marker3958	163.626	Marker5339	127.235	Marker60973	101.359
Marker20956	140.212	Marker40240	106.734	Marker62174	116.345	Marker4716	95.982	Marker61987	163.626	Marker434	127.235	Marker20345	102.758
Marker22350	140.212	Marker18173	106.734	Marker2618	116.345	Marker9180	95.982	Marker60456	163.626	Marker59712	127.235	Marker2490	102.758
Marker61059	140.212	Marker12934	106.734	Marker2620	118.198	Marker27306	95.982	Marker16163	163.626	Marker13092	127.235	Marker465	102.758
Marker3893	140.212	Marker61097	106.734	Marker4117	118.198	Marker1554	95.982	Marker3957	163.626	Marker59937	127.235	Marker60470	103.443
Marker61058	140.766	Marker34373	107.419	Marker16048	120.051	Marker9115	95.982	Marker60951	163.626	Marker11211	127.235	Marker60197	103.443
Marker1250	140.766	Marker61136	107.419	Marker16045	120.051	Marker51338	96.036	Marker12667	163.626	Marker2728	127.235	Marker5346	104.128
Marker365	140.766	Marker10654	107.419	Marker10065	120.702	Marker8077	96.036	Marker3514	163.626	Marker24013	127.235	Marker3397	104.128
Marker15964	140.766	Marker4540	107.419	Marker10068	120.702	Marker7538	96.036	Marker21703	164.062	Marker27372	127.235	Marker59730	104.128
Marker778	140.766	Marker1243	107.419	Marker18093	120.702	Marker6088	96.678	Marker7345	164.062	Marker21065	127.235	Marker7786	104.128
Marker4459	140.766	Marker5063	107.419	Marker16049	121.904	Marker62034	96.678	Marker10155	164.062	Marker13091	127.235	Marker11322	104.128
Marker61710	140.766	Marker561	107.419	Marker4022	121.904	Marker12337	96.678	Marker10158	164.062	Marker8542	127.235	Marker59965	104.128
Marker1995	141.575	Marker34374	107.419	Marker4023	123.757	Marker10001	97.375	Marker17536	164.062	Marker2727	127.235	Marker1595	104.128
Marker61063	141.575	Marker61099	107.419	Marker10982	125.61	Marker61369	97.375	Marker19846	164.062	Marker62262	127.235	Marker34349	104.128
Marker1993	141.575	Marker61188	107.419	Marker10984	125.61	Marker27121	97.375	Marker14884	164.498	Marker61674	127.235	Marker6084	104.128
Marker7966	141.575	Marker4346	107.419	Marker10983	125.61	Marker12493	97.375	Marker12668	164.498	Marker62159	127.235	Marker60671	104.128
Marker61064	141.575	Marker3103	108.304	Marker2017	127.463	Marker10000	97.375	Marker4295	164.498	Marker61804	127.235	Marker61905	104.128
Marker15966	142.384	Marker61130	108.304	Marker10981	127.463	Marker4714	97.375	Marker62085	164.498	Marker60613	127.235	Marker23589	104.128
Marker24268	142.384	Marker60018	108.304	Marker31877	127.463	Marker2848	97.375	Marker25258	164.498	Marker7379	127.235	Marker23590	104.128
Marker59945	142.384	Marker61100	108.743	Marker2014	127.463	Marker28999	97.375	Marker14880	164.498	Marker2515	127.235	Marker61634	104.128
Marker61057	143.193	Marker61098	108.743	Marker250	129.316	Marker17173	97.375	Marker13145	164.79	Marker59713	127.235	Marker1593	104.128
Marker25282	143.193	Marker1850	108.743	Marker20824	129.316	Marker12494	97.375	Marker21869	164.79	Marker61852	127.235	Marker61631	104.128
Marker60607	143.193	Marker28688	108.743	Marker20825	129.316	Marker2849	97.375	Marker13147	164.79	Marker37917	127.235	Marker1596	104.128
Marker25314	144.002	Marker28663	108.743	Marker12453	129.316	Marker8853	97.375	Marker17645	164.79	Marker7381	127.235	Marker13465	104.128
Marker60606	144.002	Marker14432	108.743	Marker62254	129.316	Marker1337	97.375	Marker17643	164.79	Marker14365	127.591	Marker61141	104.128
Marker31975	144.002	Marker61386	108.743	Marker2018	129.316	Marker59348	97.375	Marker11993	164.79	Marker1373	127.741	Marker4449	104.128
Marker60647	144.811	Marker15995	108.743	Marker251	129.316	Marker60943	97.375	Marker9037	164.79	Marker25771	128.247	Marker3179	104.128
Marker649	144.811	Marker28687	108.743	Marker62257	129.316	Marker7327	97.375	Marker205	164.933	Marker31962	128.651	Marker4446	104.128
Marker650	144.811	Marker28689	108.743	Marker20829	129.316	Marker60923	97.375	Marker4801	165.369	Marker124	128.651	Marker20879	104.128
Marker18447	144.811	Marker50667	108.969	Marker15529	131.344	Marker3275	97.375	Marker29436	165.369	Marker31961	128.651	Marker34288	104.128
Marker648	144.811	Marker14351	108.969	Marker60410	131.437	Marker20453	97.375	Marker17963	165.805	Marker31960	128.651	Marker61621	105.17
Marker60499	145.105	Marker27716	108.969	Marker62253	131.437	Marker2591	97.375	Marker202	165.805	Marker8380	128.753	Marker59903	105.512
Marker12405	145.105	Marker28977	108.969	Marker62256	131.437	Marker12335	98.071	Marker59752	165.805	Marker12227	129.259	Marker62136	105.512
Marker15965	145.105	Marker61133	108.969	Marker62255	131.437	Marker32904	98.071	Marker2246	165.805	Marker61949	129.711	Marker2065	105.855
Marker60618	145.105	Marker2149	108.969	Marker7057	134.664	Marker25891	98.071	Marker17964	165.805	Marker3478	129.711	Marker3571	106.545
Marker60498	145.105	Marker7435	108.969	Marker29885	135.709	Marker49403	98.071	Marker204	165.805	Marker60025	129.711	Marker3572	106.545
Marker647	146.44	Marker61743	108.969	Marker30348	135.709	Marker7832	98.071	Marker14882	166.241	Marker11645	129.711	Marker166	106.887
Marker62170	146.44	Marker61259	108.969	Marker2226	135.709	Marker5752	98.071	Marker26743	166.241	Marker3477	129.711	Marker14484	107.577
Marker2273	146.44	Marker59913	108.969	Marker19154	141.852	Marker59889	98.071	Marker15611	166.241	Marker14366	130.278	Marker14487	107.919
Marker2269	146.44	Marker24815	108.969	Marker15531	145.645	Marker32372	98.071	Marker62336	166.241	Marker61429	130.77	Marker21075	108.609
Marker62171	146.44	Marker61258	108.969	Marker12452	145.645	Marker5753	98.767	Marker12670	166.241	Marker13579	130.784	Marker21072	108.951
Marker22531	147.249	Marker1695	109.183	Marker60407	145.645	Marker29464	98.767	Marker17640	166.241	Marker13577	130.784	Marker2066	111.08
Marker60998	147.531	Marker20	109.183	Marker19155	145.645	Marker60137	98.767	Marker61502	166.241	Marker13575	130.784	Marker61620	111.423
Marker10600	147.531	Marker27239	109.183	Marker60048	145.645	Marker60922	98.767	Marker14885	166.241	Marker13576	130.784	Marker18996	112.465
Marker25814	148.124	Marker26831	109.183	Marker60050	145.645	Marker14897	98.767	Marker3127	166.39	Marker1369	133.93	Marker436	112.465
Marker59565	148.124	Marker21828	109.183	Marker11038	145.645	Marker7328	98.767	Marker13190	166.39	Marker60040	133.994	Marker1271	113.15
Marker18739	148.718	Marker6413	109.183	Marker5610	145.645	Marker10488	98.767	Marker11991	166.39	Marker5908	133.994	Marker4874	113.15
Marker169	148.718	Marker27238	109.183	Marker19153	145.645	Marker7339	98.767	Marker7458	166.39	Marker62264	134.436	Marker4875	113.15
Marker62386	148.879	Marker347	109.183	Marker1806	147.123	Marker29012	98.767	Marker61990	166.39	Marker60150	134.436	Marker2966	113.15
Marker11544	148.879	Marker60068	109.183	Marker60049	147.123	Marker61346	98.767	Marker13191	166.39	Marker6143	134.436	Marker7230	113.15
Marker2682	148.879	Marker60295	110.52	Marker1807	147.123	Marker32333	98.767	Marker59749	166.676	Marker59938	134.436	Marker13324	113.15
Marker9518	148.879	Marker59987	110.52	Marker1454	147.857	Marker20460	98.767	Marker203	166.676	Marker60615	134.436	Marker2964	113.15
Marker11545	148.879	Marker61389	110.52	Marker1808	147.857	Marker9116	98.767	Marker4802	167.112	Marker6732	134.436	Marker61723	113.15
Marker8417	148.879	Marker61153	110.862	Marker60716	148.268	Marker4207	98.767	Marker29437	167.112	Marker61844	134.436	Marker7228	113.15
Marker31612	148.879	Marker61261	110.862	Marker59794	148.268	Marker14522	98.767	Marker1693	167.99	Marker6144	134.436	Marker59721	113.15
Marker23460	148.879	Marker61023	110.862	Marker14156	149.561	Marker60944	98.767	Marker60103	167.99	Marker61748	134.436	Marker3182	113.15
Marker31614	148.879	Marker60838	110.862	Marker61756	149.561	Marker20043	98.767	Marker4689	167.99	Marker433	134.436	Marker7465	113.15
Marker61720	148.879	Marker61547	110.862	Marker61648	149.561	Marker60317	98.767	Marker264	167.99	Marker13093	134.436	Marker13325	113.835
Marker31613	148.879	Marker14059	110.862	Marker23975	149.561	Marker21763	98.767	Marker17549	167.99	Marker59711	134.436	Marker1235	113.835
Marker768	149.312	Marker4313	110.862	Marker460	149.561	Marker8854	98.767	Marker209	167.99	Marker27646	134.436	Marker238	113.835
Marker1553	149.312	Marker60262	110.862	Marker9919	149.561	Marker12959	98.767	Marker60775	167.99	Marker62144	134.942	Marker3794	113.835
Marker8430	150.508	Marker1752	110.862	Marker11423	150.854	Marker1805	98.767	Marker59692	167.99	Marker3961	135.054	Marker60337	113.835
Marker767	150.508	Marker60872	110.862	Marker60731	150.854	Marker29289	98.767	Marker60783	168.363	Marker21066	135.961	Marker61414	113.835
Marker6261	150.508	Marker60284	110.862	Marker62180	150.854	Marker60205	98.789	Marker62132	168.812	Marker3962	136.114	Marker2190	113.835
Marker8808	150.508	Marker4311	110.862	Marker5318	150.854	Marker1858	98.789	Marker20444	169.85	Marker39917	136.467	Marker672	113.835
Marker13280	150.508	Marker14061	110.862	Marker14928	150.854	Marker1358	98.789	Marker60097	170.714	Marker8146	137.173	Marker5162	113.835
Marker13276	150.508	Marker366	110.862	Marker31448	150.854	Marker62033	98.789	Marker8212	171.011	Marker8149	137.173	Marker7370	113.835
Marker13278	150.508	Marker28662	110.862	Marker11421	150.854	Marker3885	98.789	Marker8210	171.011	Marker3741	137.173	Marker60191	113.835
Marker2241	150.508	Marker62086	110.862	Marker11420	151.896	Marker2898	98.789	Marker8211	171.578	Marker60781	139.308	Marker7457	113.835
Marker5577	150.508	Marker61624	110.862	Marker11422	151.896	Marker33428	99.463	Marker8209	171.92	Marker5907	140.368	Marker12425	113.835
Marker5580	150.508	Marker4312	110.862	Marker4	151.896	Marker27481	99.463	Marker61324	171.92	Marker61519	140.368	Marker60064	113.835
Marker12286	152.597	Marker5065	110.862	Marker61374	151.896	Marker61244	99.463	Marker5862	176.266	Marker3956	140.368	Marker61412	113.835
Marker18138	152.597	Marker15050	110.862	Marker3500	151.896	Marker4926	99.463	Marker61323	176.266	Marker4139	140.368	Marker59724	114.519
Marker62063	152.597	Marker18661	110.862	Marker913	151.896	Marker5445	99.463	Marker5860	176.956	Marker60879	143.401	Marker10487	114.519
Marker5581	152.597	Marker60447	110.862	Marker17659	151.896	Marker8850	99.463	Marker1787	178.726	Marker60883	143.564	Marker10884	114.519
Marker2380	152.597	Marker23428	112.422	Marker11419	152.938	Marker49402	99.463	Marker60863	178.726	Marker3479	144.697	Marker709	115.204
Marker8393	152.597	Marker15548	112.422	Marker12971	152.938	Marker7833	99.463	Marker12259	182.984	Marker59804	144.697	Marker62191	115.204
Marker5578	152.597	Marker697	112.422	Marker62010	152.938	Marker60316	99.463			Marker3476	144.697	Marker60972	115.204
Marker7980	152.597	Marker12114	112.422	Marker9621	156.991	Marker7340	99.463			Marker61950	146.831	Marker5201	115.889
Marker11965	152.597	Marker23427	112.422	Marker3501	156.991	Marker53292	100.027			Marker30783	146.831	Marker19847	115.889
Marker59566	152.597	Marker12117	112.422	Marker14152	156.991	Marker61081	100.027			Marker4470	146.831	Marker34773	115.889
Marker60287	152.597	Marker6412	112.934	Marker60708	156.991	Marker4715	100.027			Marker1938	146.831	Marker416	115.889
Marker4251	152.597	Marker61626	112.934	Marker912	156.991	Marker9179	100.027			Marker61951	146.831	Marker4027	116.574
Marker62229	153.284	Marker7031	112.934	Marker324	156.991	Marker10468	100.027			Marker60039	148.965	Marker6956	116.574
Marker1224	153.284	Marker2049	112.941	Marker31447	156.991	Marker911	100.027			Marker1049	148.965	Marker16637	116.574
Marker15241	153.284	Marker28690	112.941	Marker5990	158.146	Marker50523	100.027			Marker61697	151.099	Marker61129	116.574
Marker60060	153.971	Marker4282	112.941	Marker3087	158.146	Marker61944	100.335			Marker3965	151.099	Marker6775	116.574
Marker10688	153.971	Marker30412	112.941	Marker325	158.98	Marker1301	100.335			Marker3963	151.099	Marker239	116.574
Marker10689	153.971	Marker19	113.973	Marker9624	158.98	Marker1300	100.335			Marker8147	151.099	Marker16638	116.574
Marker19569	153.971	Marker8340	114.493	Marker9623	159.301	Marker62138	100.335			Marker8144	152.159	Marker17213	116.723
Marker12284	153.971	Marker8341	114.493	Marker60331	159.301	Marker4372	100.335			Marker12172	152.159	Marker17124	117.259
Marker13277	153.971	Marker61388	114.493	Marker62250	159.301	Marker2634	100.335			Marker2518	152.159	Marker2965	117.259
Marker12285	154.661	Marker14352	114.493	Marker5317	159.301	Marker7514	100.335			Marker14364	153.219	Marker61722	117.259
Marker61657	154.661	Marker61616	115.006	Marker17185	159.301	Marker59890	100.592			Marker18027	153.219	Marker3181	117.944
Marker22533	154.661	Marker2835	115.006	Marker3503	160.456	Marker2633	101.207			Marker20745	153.219	Marker4043	117.944
Marker21012	154.661	Marker60446	115.006	Marker15530	160.456	Marker3315	101.207			Marker18026	154.279	Marker5503	117.944
Marker21008	154.661	Marker10012	115.006	Marker23974	160.456	Marker3314	101.207			Marker38743	154.279	Marker57727	117.944
Marker61578	154.661	Marker13914	115.006	Marker5920	160.456	Marker3186	101.207			Marker2340	154.279	Marker5504	117.944
Marker23459	154.661	Marker13766	115.006	Marker3502	160.968	Marker3316	101.207			Marker2339	154.279	Marker60674	117.944
Marker61658	154.661	Marker21826	115.924	Marker3504	160.968	Marker61243	101.728			Marker14164	154.466	Marker59865	117.944
Marker5582	154.661	Marker4755	115.924	Marker60333	161.611	Marker32644	101.728			Marker34351	155.338	Marker2789	117.944
Marker60059	154.661	Marker12808	115.924	Marker9675	162.957	Marker20196	101.728			Marker27371	155.338	Marker6988	117.944
Marker3233	154.661	Marker28661	115.924	Marker1194	162.957	Marker62139	104.767			Marker3299	155.338	Marker12962	117.944
Marker21011	154.661	Marker61614	116.38	Marker6513	162.957	Marker11879	104.767			Marker62242	156.398	Marker825	117.944
Marker5579	154.661	Marker480	116.38	Marker59650	162.957	Marker9380	108.328			Marker15388	156.398	Marker10249	117.944
Marker5417	154.661	Marker18905	116.38	Marker59735	162.957	Marker60278	108.328			Marker6141	156.398	Marker2357	118.629
Marker21009	154.661	Marker61741	116.38	Marker9674	162.957	Marker57818	108.404			Marker5533	156.398	Marker6221	118.629
Marker7390	154.661	Marker4347	116.38	Marker61757	163.937	Marker1214	108.404			Marker62245	156.398	Marker10703	118.629
Marker21013	154.661	Marker9481	116.38	Marker60332	163.937	Marker62056	108.404			Marker14856	156.533	Marker5376	118.629
Marker8392	154.661	Marker61868	116.38	Marker59793	163.937	Marker5389	113.149			Marker449	156.533	Marker61721	118.629
Marker13730	154.661	Marker4894	116.38	Marker17656	163.937	Marker5388	113.149			Marker4525	156.533	Marker4768	118.629
Marker12283	154.661	Marker60445	116.723	Marker9622	163.937	Marker7156	113.713			Marker28154	156.533	Marker569	118.629
Marker62228	155.004	Marker6252	116.723	Marker60000	163.937	Marker1540	113.713			Marker462	156.533	Marker60982	118.629
Marker8175	155.004	Marker38632	116.723	Marker59649	164.28	Marker62057	113.713			Marker447	156.533	Marker59655	118.629
Marker10131	155.004	Marker14060	117.412	Marker5525	164.693	Marker7157	114.277			Marker461	156.533	Marker418	118.629
Marker8768	155.004	Marker15994	117.412	Marker3651	165.524	Marker541	114.842			Marker60207	156.533	Marker4872	119.314
Marker15239	155.004	Marker2834	117.412	Marker3	165.524	Marker16480	115.406			Marker4967	156.533	Marker21212	119.314
Marker60037	155.004	Marker10013	118.102	Marker3322	166.286	Marker60054	115.97			Marker60369	156.533	Marker62267	119.314
Marker61196	155.004	Marker5215	118.102	Marker59789	166.286	Marker61486	117.106			Marker7658	156.533	Marker61065	122.484
Marker61762	155.004	Marker11907	118.102	Marker14011	166.286	Marker61487	117.106			Marker17045	156.533	Marker19596	124.568
Marker60035	155.004	Marker61022	118.102	Marker459	166.356	Marker60277	117.633			Marker14857	156.533	Marker19595	125.253
Marker60033	155.004	Marker14062	118.102	Marker8650	166.769	Marker35931	117.633			Marker463	156.533	Marker19597	125.253
Marker33260	155.004	Marker11908	118.102	Marker5856	168.293	Marker35932	117.633			Marker937	156.533	Marker26621	128.051
Marker1223	155.004	Marker1751	118.102	Marker5855	168.293	Marker16479	118.822			Marker11590	157.039	Marker7359	129.43
Marker61986	155.604	Marker1741	118.102	Marker8923	168.293	Marker12615	119.958			Marker8358	157.545	Marker23592	130.115
Marker61093	155.604	Marker54584	118.102	Marker61274	168.293	Marker17526	120.522			Marker62043	158.051	Marker23591	130.8
Marker61092	155.604	Marker6372	118.102	Marker5128	168.893	Marker17527	120.522			Marker33134	158.532	Marker21541	132.884
Marker1769	155.604	Marker15049	118.102	Marker61893	168.893	Marker60875	120.522			Marker4029	158.532	Marker21592	133.569
Marker7981	155.604	Marker61617	118.102	Marker17655	170.3	Marker58417	122.115			Marker33135	158.532	Marker26295	134.254
Marker61869	155.604	Marker9484	118.445	Marker14519	170.3	Marker14744	122.115			Marker61816	159.592	Marker6601	134.939
Marker33259	156.205	Marker431	118.445	Marker17658	170.3	Marker15109	122.238			Marker1050	159.592	Marker21590	137.737
Marker15238	156.205	Marker60261	118.445	Marker60004	170.3	Marker612	123.374			Marker1052	159.592	Marker21589	137.737
Marker8686	156.609	Marker9482	118.445	Marker60003	170.3	Marker611	124.51			Marker33133	159.592	Marker17381	138.421
Marker17047	156.609	Marker60893	118.445	Marker6	170.3	Marker10167	124.767			Marker11550	160.652	Marker3570	139.106
Marker3567	156.609	Marker3461	118.445	Marker4394	170.3	Marker610	125.075			Marker61817	160.652	Marker18450	141.19
Marker20474	156.609	Marker17817	119.027	Marker4393	170.3	Marker9817	125.639			Marker11552	160.652	Marker5519	141.875
Marker8419	156.805	Marker12933	119.027	Marker62272	170.579	Marker9818	125.639			Marker11549	161.712	Marker60857	143.254
Marker8420	156.805	Marker20413	119.027	Marker2750	170.579	Marker9819	125.639			Marker9865	163.846	Marker17553	143.254
Marker61095	156.805	Marker414	119.027	Marker22417	170.579	Marker2075	125.639			Marker10046	164.039	Marker60858	143.254
Marker61576	156.805	Marker20662	119.027	Marker39743	170.992	Marker10226	125.639			Marker62243	164.039	Marker60859	143.254
Marker60286	156.805	Marker25592	119.61	Marker6927	170.992	Marker61046	127.355			Marker62244	164.039	Marker334	143.254
Marker16340	156.805	Marker277	120.117	Marker2748	171.824	Marker18497	127.355			Marker2631	164.906	Marker17552	143.939
Marker10690	156.805	Marker1559	120.117	Marker60327	172.237	Marker2296	127.394			Marker5247	167.04	Marker1988	146.737
Marker29890	156.805	Marker60849	120.117	Marker28111	172.237	Marker10224	127.394			Marker5245	167.04	Marker8332	147.422
Marker8418	156.805	Marker34207	120.784	Marker23767	172.306	Marker10223	127.394			Marker24557	167.184	Marker30394	148.107
Marker22197	157.406	Marker8284	120.948	Marker1755	172.306	Marker61047	127.919			Marker60183	167.69	Marker1253	150.191
Marker21010	157.406	Marker8286	120.948	Marker16926	172.306	Marker10225	128.266			Marker60185	168.196	Marker1252	150.876
Marker22771	157.406	Marker60479	121.778	Marker16925	172.306	Marker61754	128.266			Marker5244	169.174	Marker1659	151.561
Marker5415	157.406	Marker60850	121.778	Marker28110	173.069	Marker10227	128.266			Marker14165	169.215	Marker16316	152.246
Marker60160	157.406	Marker276	122.609	Marker2931	173.069	Marker6607	129.055			Marker14167	169.215	Marker16318	152.246
Marker1233	157.406	Marker60851	122.609	Marker28109	173.069	Marker6606	129.055			Marker3213	170.234	Marker22489	152.931
Marker2192	157.406	Marker28148	123.781	Marker28246	173.9	Marker10228	129.137			Marker1646	170.234	Marker61320	152.931
Marker61094	157.406	Marker8630	123.781	Marker12436	173.9	Marker6960	130.893			Marker9199	170.234	Marker22488	153.615
Marker33262	157.406	Marker4757	123.781	Marker5	174.313	Marker1007	131.359			Marker62046	170.234	Marker10925	155.699
Marker15242	157.406	Marker60412	124.282	Marker2	174.313	Marker31271	131.359			Marker62044	170.234	Marker16320	155.699
Marker2194	157.406	Marker60413	124.282	Marker61269	174.313	Marker782	131.764			Marker62047	170.234	Marker25266	156.384
Marker61116	157.406	Marker5064	128.683	Marker7	174.313	Marker62294	131.764			Marker464	170.234	Marker61327	158.468
Marker8173	157.406	Marker61260	128.683	Marker8423	174.313	Marker59988	132.636			Marker62045	170.234	Marker13994	158.468
Marker60057	158.438	Marker413	128.683	Marker14012	174.313	Marker59990	132.636			Marker59707	170.234	Marker12847	158.468
Marker61870	158.438	Marker2639	128.683	Marker4395	174.313	Marker59989	132.636			Marker1645	170.234	Marker1784	158.468
Marker29891	158.438	Marker60848	128.683	Marker3089	174.313	Marker679	135.287			Marker61146	170.234	Marker2320	159.847
Marker1768	158.438	Marker16031	128.683	Marker17657	174.313	Marker54271	135.287			Marker4526	171.849	Marker13934	159.847
Marker8174	158.438	Marker415	128.683	Marker61375	174.313	Marker11416	136.159			Marker13247	171.849	Marker13933	159.847
Marker11114	158.438	Marker20668	128.683	Marker18330	174.313	Marker60022	137.031			Marker14858	171.849	Marker17386	160.532
Marker335	158.438	Marker9483	128.683	Marker5935	174.313	Marker45848	138.035			Marker4968	171.849	Marker14894	160.532
Marker18137	159.345	Marker60067	128.683	Marker59886	174.313	Marker2289	138.035			Marker61861	172.053	Marker20292	160.532
Marker15237	159.345	Marker17961	129.266	Marker13938	174.313	Marker2111	138.6			Marker95	172.053	Marker60801	160.532
Marker60999	159.345	Marker60283	129.266	Marker5936	174.313	Marker2109	138.6			Marker11592	172.651	Marker61629	160.532
Marker21715	159.345	Marker34206	130.439	Marker62273	174.313	Marker17481	138.6			Marker61712	172.651	Marker61705	160.532
Marker16341	159.345	Marker61135	130.439	Marker56712	174.656	Marker4038	138.6			Marker9061	172.651	Marker2322	161.217
Marker14524	159.345	Marker46075	130.439	Marker39742	174.656	Marker6205	138.786			Marker11591	172.651	Marker10198	161.902
Marker61577	159.345	Marker60658	132.201	Marker61895	174.656	Marker6206	138.786			Marker61711	172.651	Marker577	161.902
Marker33261	159.796	Marker60659	132.201	Marker8	174.656	Marker10450	139.164			Marker6686	173.197	Marker4371	161.902
Marker2193	161.312	Marker60657	132.201	Marker1753	174.656	Marker3777	140.541			Marker17060	173.197	Marker62237	161.902
Marker6062	161.312	Marker481	132.201	Marker9	174.656	Marker59935	141.413			Marker1707	173.197	Marker62239	161.902
Marker61673	161.312	Marker60285	132.201	Marker16924	175.259	Marker43	141.413			Marker13248	173.569	Marker1142	161.902
Marker15440	164.092	Marker8244	135.594	Marker12799	175.862	Marker59936	141.413			Marker446	173.569	Marker60595	162.587
Marker8416	164.092	Marker2061	135.594	Marker59887	176.251	Marker59742	141.413			Marker4524	173.569	Marker60978	163.272
Marker15439	164.092	Marker7306	135.594	Marker61376	176.251	Marker934	141.468			Marker963	173.569	Marker2795	163.957
Marker2240	165	Marker36508	135.594	Marker14425	176.465	Marker61349	141.468			Marker14860	173.569	Marker7881	163.957
Marker61946	165.907	Marker60655	135.594	Marker60895	176.465	Marker935	141.468			Marker965	173.569	Marker39901	165.336
Marker61947	165.907	Marker60656	135.594	Marker18332	177.044	Marker61348	141.468			Marker62189	173.569	Marker1674	165.336
Marker61945	165.907	Marker2060	135.594	Marker5938	177.044	Marker24652	142.032			Marker4970	173.569	Marker61652	165.336
Marker9519	165.907	Marker61087	135.594	Marker5937	177.044	Marker2367	143.168			Marker19115	173.743	Marker14893	165.336
Marker9275	167.142	Marker1277	137.267	Marker18328	177.044	Marker2366	143.168			Marker63	173.743	Marker1835	166.716
Marker12282	167.142	Marker8245	137.267	Marker18331	177.044	Marker1023	143.168			Marker1705	174.487	Marker62109	166.716
Marker13167	167.142	Marker42579	137.267	Marker8330	177.044	Marker31	143.168			Marker118	174.487	Marker54775	168.799
Marker60005	168.569	Marker1288	137.267	Marker5127	177.044	Marker16078	143.168			Marker1954	174.487	Marker61400	168.799
Marker62128	168.569	Marker1278	137.267	Marker60228	177.044	Marker12986	143.168			Marker3726	175.405	Marker61398	168.799
Marker62098	168.569	Marker58270	137.267	Marker3208	177.068	Marker2368	143.168			Marker6124	175.405	Marker61630	168.799
Marker60036	168.569	Marker1283	137.267	Marker14010	177.068	Marker61347	144.313			Marker60640	175.405	Marker54776	168.799
Marker15702	169.698	Marker16789	138.097	Marker62137	177.836	Marker1495	144.313			Marker28156	175.405	Marker17387	168.799
Marker33767	169.698	Marker16791	138.097	Marker692	177.836	Marker61350	144.313			Marker61824	175.405	Marker60916	168.799
Marker15699	169.698	Marker8247	138.928	Marker12434	177.836	Marker1498	144.881			Marker61822	175.405	Marker1783	168.799
Marker14315	170.605	Marker1284	138.928	Marker60436	178.628	Marker59881	144.881			Marker59706	175.405	Marker14139	170.179
Marker31303	171.443	Marker1281	139.758	Marker1708	178.628	Marker58377	144.881			Marker61392	175.405	Marker60977	170.179
Marker31305	171.443	Marker1280	139.758	Marker61834	180.17	Marker1497	145.449			Marker11685	175.405	Marker14137	170.179
Marker15701	171.513	Marker10500	139.758	Marker10466	180.224	Marker12983	145.79			Marker14862	175.405	Marker575	170.179
Marker15700	172.42	Marker4758	139.758	Marker61270	180.224	Marker59880	146.018			Marker9399	175.405	Marker1672	170.179
Marker31304	172.871	Marker8246	139.758	Marker8331	180.224	Marker59879	147.162			Marker1644	175.405	Marker61199	170.179
Marker19133	172.871	Marker1287	140.589	Marker2749	180.224	Marker45844	147.526			Marker448	175.405	Marker713	170.179
Marker26963	172.871	Marker61806	141.42	Marker60341	182.634	Marker2160	148.891			Marker7657	175.405	Marker29724	170.864
Marker62110	172.871	Marker20915	141.42	Marker60139	182.634	Marker61091	148.891			Marker1643	175.405	Marker4834	171.548
Marker62111	172.871	Marker61808	142.25	Marker60140	182.634	Marker7062	153.043			Marker2632	175.405	Marker4833	171.548
Marker19134	172.871	Marker61809	143.081	Marker60138	182.634	Marker7064	153.043			Marker964	175.405	Marker60596	171.548
Marker62112	173.556	Marker12185	143.081	Marker61892	182.634	Marker2755	153.823			Marker2791	175.405	Marker61714	171.548
Marker3130	174.245	Marker61749	143.081	Marker26251	194.941	Marker23046	153.823			Marker7659	175.405	Marker4835	171.548
Marker3132	174.245	Marker9976	144.753	Marker59790	194.941	Marker60172	154.187			Marker61397	175.405	Marker1147	172.233
Marker3129	174.931	Marker12183	144.753	Marker61894	207.247	Marker789	154.685			Marker62190	175.405	Marker1141	172.233
Marker3133	175.934	Marker3433	144.753	Marker14426	210.26	Marker790	154.685			Marker61399	175.405	Marker1145	172.918
Marker57632	175.934	Marker9977	145.096	Marker61112	210.26	Marker788	154.685			Marker5681	175.405	Marker1144	172.918
Marker57634	175.934	Marker12184	145.096	Marker14424	210.26	Marker7903	154.685			Marker2793	175.405	Marker1143	174.298
Marker59931	178.018	Marker3434	145.745	Marker17861	212.494	Marker60171	154.755			Marker61825	175.405	Marker1146	174.298
Marker7000	178.703	Marker55	146.395	Marker59888	213.272	Marker61995	154.755			Marker61396	175.405	Marker7882	174.983
Marker6999	178.703	Marker27337	147.044	Marker19219	213.272	Marker59926	160.042			Marker60202	175.405	Marker14500	174.983
Marker25930	179.388	Marker26549	148.822	Marker39997	213.272	Marker59929	160.042			Marker61978	175.405	Marker8054	174.983
Marker27897	180.282	Marker16228	148.822	Marker14926	213.272	Marker26121	160.042			Marker3114	175.405	Marker14138	174.983
Marker25889	180.282	Marker7200	149.547	Marker60814	215.004	Marker19859	160.174			Marker9008	175.405	Marker29722	174.983
Marker27899	180.282	Marker9638	149.547	Marker61891	215.004	Marker8535	160.174			Marker8771	176.09	Marker13935	174.983
Marker36571	180.282	Marker16782	150.384	Marker15155	215.004	Marker8538	160.174			Marker8769	176.09	Marker60087	174.983
Marker3853	182.186	Marker2489	150.384			Marker24428	160.904			Marker2064	176.09	Marker59898	174.983
Marker22168	182.186	Marker2486	151.033			Marker28631	162.495			Marker9345	176.09	Marker14892	174.983
Marker31766	183.08	Marker2485	151.033			Marker61489	162.495			Marker61016	176.775	Marker29723	174.983
Marker919	183.08	Marker2488	152.341			Marker4349	162.495			Marker14861	176.775	Marker25342	174.983
Marker61898	183.08	Marker2487	152.341			Marker4287	162.495			Marker43138	176.775	Marker15457	174.983
Marker25890	183.08	Marker573	152.341			Marker8534	162.495			Marker11589	176.775	Marker26906	176.362
Marker17021	183.08	Marker572	152.341			Marker17295	162.64			Marker8770	176.775	Marker61706	176.362
Marker3556	183.08	Marker2483	152.341			Marker17296	162.64			Marker61390	176.775	Marker61704	176.362
Marker61221	183.08	Marker2484	152.341			Marker17294	162.64			Marker4969	176.775	Marker61703	176.362
Marker9766	183.08	Marker571	152.341			Marker17298	162.64			Marker60371	176.775	Marker60805	177.047
Marker62049	183.08	Marker12309	153.649			Marker61009	165.262			Marker2630	176.775	Marker15595	179.131
Marker9767	183.08	Marker12311	153.649			Marker23919	165.262			Marker60208	177.46	Marker15594	183.389
Marker57637	184.269	Marker10454	153.649			Marker17348	165.262			Marker64	177.46
Marker57633	184.269	Marker10455	154.298			Marker7067	166.124			Marker60368	177.46
Marker57635	184.269	Marker20333	154.298			Marker60769	166.124			Marker939	177.46
Marker62048	184.46	Marker6202	154.841			Marker7069	166.124			Marker1949	177.46
Marker25932	185.145	Marker6200	154.841			Marker5538	166.986			Marker1953	177.46
Marker60148	185.145	Marker6201	155.565			Marker4985	167.848			Marker25198	177.46
Marker25931	185.145	Marker6203	155.565			Marker30037	168.562			Marker936	177.46
Marker60149	185.145	Marker12314	156.274			Marker30034	168.562			Marker1950	177.46
Marker60147	185.145	Marker12306	156.274			Marker30036	168.562			Marker5437	177.46
Marker844	185.145	Marker12316	156.923			Marker30035	168.562			Marker1703	177.46
Marker20070	185.83	Marker12313	156.923			Marker2752	168.71			Marker119	177.46
Marker20068	185.83	Marker12307	156.923			Marker4588	168.71			Marker60366	177.46
Marker25675	186.353	Marker12312	156.923			Marker17299	168.71			Marker117	177.46
Marker20069	187.209	Marker12308	156.923			Marker23466	169.571			Marker1704	177.46
Marker20067	187.209	Marker12315	157.573			Marker60633	173.092			Marker1706	178.144
Marker4543	187.733	Marker12305	157.573			Marker8088	173.092			Marker19114	178.144
Marker19762	187.733	Marker19886	157.77			Marker19861	173.342			Marker61859	178.144
Marker5364	187.894	Marker19887	157.77			Marker19862	173.342			Marker61860	178.144
Marker3131	187.894	Marker1122	158.881			Marker23044	173.342			Marker60641	178.144
Marker61330	189.112	Marker60832	158.881			Marker4581	173.954			Marker34871	178.144
Marker61329	189.112	Marker12310	158.881			Marker42617	174.816			Marker5682	178.144
Marker61331	189.112	Marker1463	161.496			Marker19172	174.816			Marker94	178.144
Marker6159	189.112	Marker16781	161.496			Marker1004	174.816			Marker62396	178.829
Marker61290	190.692	Marker19888	161.496			Marker18869	174.816			Marker5246	178.829
Marker31765	190.692	Marker61594	162.221			Marker2414	175.678			Marker3724	183.087
Marker27109	191.196	Marker4013	162.221			Marker2413	175.678			Marker3727	183.772
Marker27110	191.196	Marker2990	162.221			Marker7265	176.265			Marker3725	185.152
Marker31764	191.377	Marker60248	162.221			Marker4946	176.265			Marker2792	190.044
Marker2497	191.88	Marker2989	162.221			Marker61307	176.265			Marker13504	194.884
Marker60144	191.88	Marker12877	162.221			Marker24429	176.265			Marker13503	194.884
Marker25929	191.88	Marker1462	162.563			Marker15555	176.265			Marker13505	194.884
Marker27895	192.062	Marker20331	162.563			Marker61308	176.265
Marker60145	192.565	Marker61760	162.563			Marker3472	176.265
Marker60143	192.565	Marker1461	162.563			Marker1537	176.54
Marker19761	194.649	Marker61593	163.253			Marker5848	176.54
Marker544	194.649	Marker60776	163.253			Marker18690	176.833
Marker62246	194.649	Marker1460	163.253			Marker13809	176.833
Marker59740	194.649	Marker19490	163.253			Marker60937	177.402
Marker2496	194.649	Marker61759	163.253			Marker24427	177.402
Marker543	194.649	Marker61758	163.253			Marker23045	177.402
Marker25927	194.649	Marker3084	164.457			Marker24014	177.402
Marker25925	200.168	Marker6112	164.457			Marker24015	177.402
Marker14547	200.168	Marker3082	164.457			Marker61309	177.402
Marker25926	200.168	Marker3083	164.457			Marker4586	177.402
Marker25928	200.168	Marker60559	164.709			Marker13811	177.402
Marker27894	211.581	Marker10184	164.709			Marker61304	177.402
Marker27896	211.581	Marker35588	164.709			Marker3471	177.402
		Marker39563	165.187			Marker26435	177.841
		Marker10186	165.187			Marker23920	177.841
		Marker7189	166.151			Marker26438	177.841
		Marker1459	166.63			Marker62135	177.841
		Marker16783	166.63			Marker16741	177.841
		Marker59806	166.63			Marker19169	177.841
		Marker16784	166.63			Marker2081	177.841
		Marker59808	166.63			Marker26437	177.841
		Marker14261	166.882			Marker19170	177.841
		Marker30010	166.882			Marker5108	177.841
		Marker14260	166.882			Marker4582	177.841
		Marker2822	166.882			Marker16739	177.841
		Marker14259	166.882			Marker5692	177.841
		Marker4073	168.086			Marker7904	177.841
		Marker30789	168.086			Marker16743	177.841
		Marker6140	168.086			Marker7090	178.28
		Marker60247	168.775			Marker13810	178.958
		Marker1180	169.465			Marker8561	178.958
		Marker4032	170.155			Marker7899	179.164
		Marker10185	170.155			Marker7900	179.164
		Marker30788	170.864			Marker59826	179.164
		Marker4771	170.864			Marker26436	179.603
		Marker60320	170.864			Marker60351	179.603
		Marker419	170.864			Marker9967	179.603
		Marker61422	171.544			Marker24425	180.042
		Marker19820	171.544			Marker883	180.042
		Marker61421	171.887			Marker4984	180.042
		Marker4074	173.648			Marker24426	180.042
		Marker1420	173.648			Marker1005	180.042
		Marker61419	175.047			Marker4583	180.515
		Marker4772	175.047			Marker4587	180.515
		Marker588	176.344			Marker28625	181.835
		Marker586	176.344			Marker28626	181.835
		Marker587	176.344			Marker57392	182.072
		Marker589	176.989			Marker13812	182.072
		Marker7443	176.989			Marker1149	183.629
		Marker13545	177.271			Marker689	183.629
		Marker60052	177.271			Marker1965	183.629
		Marker10538	177.271			Marker61428	183.629
		Marker1292	177.271			Marker8562	183.629
		Marker61528	177.271			Marker61306	183.629
		Marker584	177.633			Marker962	183.629
		Marker583	177.633			Marker4944	183.629
		Marker7188	177.633			Marker82	183.629
		Marker582	178.277			Marker61305	183.629
		Marker585	178.922			Marker10344	183.629
		Marker5433	180.881			Marker4943	183.629
		Marker3003	181.031			Marker3475	183.629
		Marker3002	181.031			Marker8563	183.629
		Marker60909	181.031			Marker61855	183.629
		Marker26308	181.031			Marker1962	183.629
		Marker3004	181.031			Marker61878	183.629
		Marker26309	181.031			Marker11263	183.629
		Marker35227	181.031			Marker1963	183.629
		Marker34462	181.526			Marker61879	183.629
		Marker18919	181.526			Marker61881	183.629
		Marker18921	181.526			Marker60743	183.629
		Marker2574	182.503			Marker60934	183.629
		Marker26027	182.503			Marker4945	183.629
		Marker26031	182.503			Marker4585	183.629
		Marker23327	183.234			Marker60744	183.971
		Marker30011	183.234			Marker1102	183.971
		Marker60629	183.486			Marker1100	183.971
		Marker23152	183.486			Marker62080	183.971
		Marker5020	183.965			Marker19003	183.971
		Marker1421	183.965			Marker7092	183.971
		Marker11604	184.696			Marker26434	183.971
		Marker23326	184.696			Marker59827	184.656
		Marker1329	184.783			Marker18691	184.656
		Marker60630	184.783			Marker61877	184.656
		Marker1328	185.427			Marker60936	184.656
		Marker60908	185.427			Marker81	184.656
		Marker13203	185.427			Marker4519	184.656
		Marker1327	185.427			Marker19858	184.656
		Marker25533	187.511			Marker3474	184.656
		Marker2604	187.511			Marker2080	184.656
		Marker13205	187.511			Marker8090	187.494
		Marker5432	187.511			Marker9966	188.873
		Marker16696	187.511			Marker60680	188.873
		Marker26796	188.201			Marker4947	188.873
		Marker1846	188.201			Marker60211	188.873
		Marker13204	189.243			Marker9968	188.873
		Marker28994	189.243			Marker18664	190.253
		Marker28990	189.747			Marker7901	190.253
		Marker5194	191.281			Marker11708	196.784
		Marker5887	191.281			Marker11706	196.784
		Marker285	192.488			Marker7089	203.422
		Marker1845	192.488			Marker7091	203.422
		Marker6199	193.875			Marker7088	203.422
		Marker29962	193.875
		Marker60778	193.875
		Marker57451	193.875
		Marker61185	194.38
		Marker1583	194.884
		Marker3406	194.884
		Marker27634	194.884
		Marker43700	195.389
		Marker7035	195.389
		Marker61186	195.389
		Marker755	195.389
		Marker60965	195.389
		Marker60960	195.389
		Marker8395	195.733
		Marker1945	195.893
		Marker9825	196.8
		Marker37520	196.8
		Marker11488	196.909
		Marker4437	196.909
		Marker852	196.909
		Marker60957	196.909
		Marker1452	196.909
		Marker33278	196.909
		Marker62259	196.909
		Marker5401	196.909
		Marker14455	197.867
		Marker30790	197.867
		Marker38911	197.867
		Marker10537	197.867
		Marker59714	197.925
		Marker27731	197.925
		Marker1944	197.925
		Marker15926	197.925
		Marker10151	198.429
		Marker60964	198.429
		Marker62307	198.933
		Marker9826	198.933
		Marker60961	198.933
		Marker6392	198.933
		Marker9827	198.933
		Marker9308	198.933
		Marker9309	198.933
		Marker13736	198.933
		Marker60062	198.933
		Marker25785	198.933
		Marker45032	198.933
		Marker10649	198.933
		Marker60434	198.933
		Marker4086	198.933
		Marker1450	198.933
		Marker62089	198.933
		Marker2165	198.933
		Marker1734	198.933
		Marker1737	198.933
		Marker61420	198.933
		Marker19908	198.933
		Marker17830	198.933
		Marker11690	198.933
		Marker4754	199.618
		Marker60958	199.618
		Marker2875	199.618
		Marker1451	199.618
		Marker2920	199.618
		Marker37518	200.303
		Marker62042	200.988
		Marker8394	200.988
		Marker8396	200.988
		Marker30013	200.988
		Marker62100	200.988
		Marker1419	202.368
		Marker12774	202.368
		Marker2606	202.368
		Marker26053	202.368
		Marker12771	202.368
		Marker27635	203.747
		Marker27636	203.747
		Marker45658	203.876
		Marker20922	203.876
		Marker23156	203.876
		Marker26028	205.127
		Marker61319	205.256
		Marker60632	205.256
		Marker60558	205.811
		Marker1041	205.811
		Marker35226	206.496
		Marker57452	206.496
		Marker3008	206.635
		Marker9857	208.58
		Marker3010	208.719
		Marker5334	208.719
		Marker10248	208.719
		Marker60631	208.719
		Marker59728	208.719
		Marker3009	208.719
		Marker45659	208.719
		Marker5362	209.265
		Marker5352	209.265
		Marker1457	209.95
		Marker10153	209.95
		Marker10648	209.95
		Marker10152	209.95
		Marker61160	209.95
		Marker28068	209.95
		Marker59884	210.098
		Marker2991	210.098
		Marker25745	210.098
		Marker61083	210.635
		Marker61159	210.635
		Marker61200	210.635
		Marker12772	210.635
		Marker61082	210.635
		Marker61595	210.783
		Marker61513	211.468
		Marker8198	211.468
		Marker60997	212.014
		Marker62070	212.153
		Marker26357	212.153
		Marker59933	213.394
		Marker62095	213.394
		Marker62308	214.237
		Marker18925	214.237
		Marker62090	216.916
		Marker974	216.916
		Marker13544	216.916
		Marker23863	223.969
		Marker23861	223.969
		Marker18924	225.348
		Marker20271	225.348
