# Supplementary material for: Construction of a high-density genetic map using specific-locus amplified fragment sequencing and quantitative trait loci analysis for tillering related traits in Psathyrostachys juncea perennial grass
Source: PeerJ. 2024 Nov 6;12:e18409. doi: 10.7717/peerj.18409 (PMC11549907; doi:10.7717/peerj.18409)
Supplement: Supplemental Information 3 [file peerj-12-18409-s003.xlsx]

## Sheet: Sheet1
QTL analysis of tiller-related traits.
Trait	Year	QTL loci	LOD value	Linkage groups	Markers	Position of QTL/ cM	Phenotypic variation explained /%
PH	2021	qPH-3-1	2.64	3	Marker60139	182.634	7.9
		qPH-5-1	2.59	5	Marker19012	16.8	7.8
		qPH-5-2	3.07	5	Marker19014	14.717	9.2
	2022	qPH-1-1	2.73	1	Marker18138	152.597	8.2
		qPH-1-2	2.71	1	Marker60060	153.971	8.1
		qPH-1-3	2.73	1	Marker12285	154.661	8.2
		qPH-5-3	2.57	5	Marker839	155.581	7.5
		qPH-5-4	2.59	5	Marker61982	155.667	7.7
		qPH-5-5	2.61	5	Marker840	157.983	7.9
	2023	qPH-2-1	2.53	2	Marker60295	110.52	7.6
		qPH-2-2	2.53	2	Marker61153	110.862	7.6
		qPH-2-3	2.62	2	Marker23428	112.422	7.9
		qPH-2-4	2.35	2	Marker8340	114.493	7.1
		qPH-2-5	2.53	2	Marker61616	115.006	7.6
		qPH-2-6	2.61	2	Marker21826	115.924	7.8
		qPH-2-7	2.62	2	Marker61614	116.38	7.9
		qPH-2-8	2.53	2	Marker60445	116.723	7.6
		qPH-2-9	2.53	2	Marker10013	118.102	7.6
		qPH-2-10	2.53	2	Marker9484	118.445	7.6
		qPH-2-11	3.65	2	Marker28148	123.781	10.8
		qPH-2-12	3.88	2	Marker60412	124.282	11.5
		qPH-2-13	3.75	2	Marker5064	128.683	11.1
		qPH-2-14	2.67	2	Marker17961	129.266	8
		qPH-4-1	3.15	4	Marker60633	173.092	9.4
		qPH-4-2	3.24	4	Marker19861	173.342	9.7
		qPH-4-3	2.87	4	Marker42617	174.816	8.6
		qPH-4-4	2.52	4	Marker7265	176.265	7.5
		qPH-4-5	2.56	4	Marker13810	178.958	7.7
		qPH-4-6	2.59	4	Marker7899	179.164	7.8
		qPH-4-7	3.07	4	Marker24425	180.042	9.2
		qPH-4-8	2.96	4	Marker4583	180.515	8.9
		qPH-5-6	2.58	5	Marker15364	128.423	7.8
		qPH-5-7	2.76	5	Marker1346	129.108	8.3
		qPH-5-8	2.87	5	Marker11066	129.436	8.6
		qPH-5-9	2.92	5	Marker3254	129.793	8.7
		qPH-5-10	2.77	5	Marker62288	130.121	8.3
		qPH-5-11	2.61	5	Marker3251	130.478	7.9
		qPH-5-12	2.92	5	Marker5780	135.668	8.7
		qPH-5-13	2.89	5	Marker9038	136.353	8.7
TN	2021	qTN-2-1	2.6	2	Marker6457	84.011	7.8
		qTN-2-2	2.78	2	Marker23328	85.137	8.3
		qTN-2-3	2.6	2	Marker1174	85.604	7.8
		qTN-2-4	2.56	2	Marker19811	85.696	7.7
	2022	qTN-3-1	3.09	3	Marker24353	43.311	9.2
		qTN-3-2	2.66	3	Marker6617	44.093	8
		qTN-3-3	2.83	3	Marker24860	45.749	8.5
		qTN-3-4	3.16	3	Marker7552	46.967	9.4
		qTN-3-5	3.29	3	Marker36651	48.071	9.8
		qTN-3-6	4.13	3	Marker12635	52.554	12.1
		qTN-3-7	4.12	3	Marker11870	53.624	12.1
		qTN-3-8	3.07	3	Marker36652	56.757	9.2
		qTN-3-9	3.11	3	Marker8105	56.941	9.3
		qTN-3-10	2.83	3	Marker41055	60.345	8.5
		qTN-3-11	2.54	3	Marker59671	63.713	7.7
	2023	qTN-1-1	2.51	1	Marker3129	174.931	7.5
		qTN-1-2	2.53	1	Marker3133	175.934	7.4
		qTN-2-1	2.61	2	Marker34206	130.439	7.9
		qTN-2-2	2.61	2	Marker60658	132.201	7.9
BD	2021	qBD-3-1	3.45	3	Marker26251	194.941	10.2
		qBD-3-2	3.29	3	Marker61894	207.247	9.8
		qBD-3-3	2.89	3	Marker14426	210.26	8.6
		qBD-3-4	2.84	3	Marker59888	213.272	8.5
		qBD-3-5	2.87	3	Marker60814	215.004	8.6
		qBD-6-1	2.83	6	Marker12603	100.18	8.5
		qBD-6-2	2.72	6	Marker11460	100.828	8.2
		qBD-6-3	2.65	6	Marker5675	101.199	8
		qBD-6-4	2.74	6	Marker34894	101.888	8.2
		qBD-6-5	2.75	6	Marker7923	102.948	7.6
		qBD-6-6	2.52	6	Marker62016	105.082	7.7
		qBD-6-7	2.55	6	Marker2941	106.024	7.8
		qBD-6-8	2.59	6	Marker59848	106.53	7.8
		qBD-6-9	2.6	6	Marker60441	107.036	7.8
		qBD-6-10	2.63	6	Marker4705	108.306	7.9
		qBD-6-11	2.74	6	Marker4704	110.44	8.2
		qBD-6-12	2.57	6	Marker7921	111.5	7.8
		qBD-6-13	2.59	6	Marker61378	112.56	7.7
		qBD-6-14	2.6	6	Marker20746	113.619	8.2
	2022	qBD-2-1	2.6	2	Marker12309	153.649	7.8
		qBD-2-2	2.65	2	Marker10455	154.298	8
		qBD-2-3	2.58	2	Marker1459	166.63	7.8
		qBD-2-4	2.56	2	Marker14261	166.882	7.7
		qBD-3-6	2.52	3	Marker7909	54.407	7.6
	2023	qBD-2-5	3.18	2	Marker9346	16.103	9.5
		qBD-2-6	3.15	2	Marker26600	16.434	9.4
		qBD-2-7	2.88	2	Marker60824	17.483	8.7
		qBD-2-8	2.91	2	Marker60821	18.167	8.7
		qBD-2-9	2.7	2	Marker32936	18.852	8.1
SL	2021	qSL-4-1	4.63	4	Marker60937	177.402	11.3
		qSL-4-2	4.63	4	Marker26435	177.841	13.5
		qSL-4-3	4.32	4	Marker1149	183.629	12.7
		qSL-4-4	4.63	4	Marker60744	183.971	13.5
		qSL-4-5	4.31	4	Marker59827	184.656	12.7
		qSL-4-6	4.01	4	Marker9966	188.873	11.8
		qSL-4-7	3.35	4	Marker11708	196.784	9.9
		qSL-4-8	3.35	4	Marker7089	203.422	10
	2022	qSL-2-1	2.89	2	Marker6803	31.281	8.6
		qSL-2-2	2.89	2	Marker13065	31.914	8.6
		qSL-2-3	2.82	2	Marker15506	33.294	8.3
		qSL-2-4	2.85	2	Marker687	35.377	8.5
		qSL-2-5	2.84	2	Marker60884	39.555	8.5
		qSL-2-6	2.56	2	Marker14380	39.797	7.7
	2023	qSL-2-7	2.51	2	Marker6460	77.482	7.6
		qSL-2-8	3.11	2	Marker6455	80.213	9.3
		qSL-2-9	3.32	2	Marker6975	83.451	9.9
		qSL-2-10	3.46	2	Marker4630	86.487	10.3
		qSL-2-11	2.88	2	Marker59748	88.267	8.6
		qSL-2-12	2.57	2	Marker28194	92.507	7.7
		qSL-2-13	2.55	2	Marker60552	97.415	7.7
SW	2021	qSW-1-1	2.52	1	Marker5810	1.379	7.6
		qSW-1-2	2.51	1	Marker10672	4.7	7.6
		qSW-1-3	2.54	1	Marker2159	5.277	7.6
		qSW-1-4	2.88	1	Marker11951	6.231	8.6
		qSW-1-5	2.9	1	Marker8122	7.186	8.7
		qSW-1-6	2.62	1	Marker5952	8.021	7.9
		qSW-1-7	2.57	1	Marker2084	8.14	7.7
		qSW-5-1	2.93	5	Marker1832	141.881	8.8
		qSW-5-2	2.81	5	Marker1831	142.566	8.4
		qSW-5-3	2.63	5	Marker60919	143.251	7.9
		qSW-5-4	2.55	5	Marker57682	159.144	7.7
		qSW-5-5	2.55	5	Marker61337	159.819	7.7
	2022	qSW-3-1	2.53	3	Marker7522	18.136	7.6
		qSW-3-2	2.82	3	Marker8014	18.831	8.4
		qSW-3-3	2.49	3	Marker25250	19.516	7.5
		qSW-3-4	2.35	3	Marker25256	20.548	7.1
		qSW-3-5	2.74	3	Marker921	21.932	8.2
		qSW-6-1	2.93	6	Marker34895	91.59	8.8
		qSW-6-2	2.94	6	Marker59905	94.683	8.8
		qSW-6-3	2.55	6	Marker28915	98.641	7.7
		qSW-6-4	2.83	6	Marker60075	98.694	8.5
		qSW-6-5	3.07	6	Marker16005	114.679	9.2
		qSW-6-6	2.84	6	Marker61635	119.008	8.5
		qSW-6-7	2.72	6	Marker8145	119.97	8.2
	2023	qSW-4-1	2.9	4	Marker62221	11.649	8.7
		qSW-4-2	2.68	4	Marker60360	12.364	8.1
		qSW-4-3	2.58	4	Marker18459	13.049	7.8
		qSW-4-4	2.69	4	Marker60510	17.226	8.1
		qSW-4-5	2.82	4	Marker1201	18.841	8.5
		qSW-4-6	2.71	4	Marker4734	19.108	8.1
		qSW-4-7	3.38	4	Marker61322	23.317	10.1
		qSW-4-8	3.55	4	Marker8711	23.772	10.5
		qSW-4-9	2.62	4	Marker7735	37.65	7.9
		qSW-4-10	2.58	4	Marker14333	37.723	7.8
		qSW-4-11	2.69	4	Marker27611	40.252	8.1
